# Supplementary material for: MRP3 is a sex determining gene in the diatom Pseudo-nitzschia multistriata
Source: Springer Nature journal article supplement (doi:10.1038/s41467-018-07496-0), 2018-11-22
Supplement: MOESM1 [file 41467_2018_7496_MOESM1_ESM.pdf]

## **Supplementary Information**

***MRP3 is a sex determining gene in the diatom *Pseudo-nitzschia multistriata****

Russo et al.

**Supplementary Table 1. List of genes differentially expressed between MT+ and MT- samples in the RNA-seq study.** In bold the candidate genes tested in qPCR; the five mating type related genes are underlined and marked with (^). The gene ID, logFC (logarithmic Fold Change) in RNA-seq and qPCR, p-Value, FDR (False Discovery Rate), Description of the predicted protein and the CPM (counts per million) for each RNA-seq library are reported. For the RNA-seq libraries (last nine columns), the strain name is reported above the library code (see also Supplementary Table 5). The table continues on the following page.

| Gene ID                            | logFC       | qPCR FC          |                 |                 |                                                               | Description   | MT+           |               |               |               |              | MT-          |              |              |  |
|------------------------------------|-------------|------------------|-----------------|-----------------|---------------------------------------------------------------|---------------|---------------|---------------|---------------|---------------|--------------|--------------|--------------|--------------|--|
|                                    |             | ± variance       | p-Value         | FDR             | B938                                                          |               | B856          | B856          | Sy373         | Sy373         | B857         | B857         | B939         | Sy379        |  |
|                                    |             |                  |                 |                 | Lib41                                                         |               | Lib74         | Lib HCUH      | Lib CII01     | Lib CII02     | Lib45        | Lib HCUN     | Lib77        | Lib CII2     |  |
| 0122210                            | 8.65        |                  | 2.86E-06        | 3.28E-03        | -                                                             | 0.00          | 0.81          | 2.78          | 1.79          | 0.90          | 0.00         | 0.00         | 0.00         | 0.00         |  |
| <b><u>0020770</u></b> <sup>^</sup> | <b>8.53</b> | <b>7.5 ± 5</b>   | <b>8.46E-22</b> | <b>1.00E-17</b> | -                                                             | <b>7.80</b>   | <b>14.22</b>  | <b>8.68</b>   | <b>10.32</b>  | <b>16.16</b>  | <b>0.09</b>  | <b>0.00</b>  | <b>0.04</b>  | <b>0.00</b>  |  |
| 0109190                            | 7.22        |                  | 6.64E-14        | 2.63E-10        | -                                                             | 2.30          | 1.47          | 2.36          | 1.98          | 3.08          | 0.02         | 0.00         | 0.03         | 0.00         |  |
| 0060210                            | 7.11        |                  | 3.55E-05        | 1.76E-02        | -                                                             | 0.00          | 0.10          | 0.22          | 0.40          | 0.61          | 0.00         | 0.00         | 0.00         | 0.00         |  |
| 0022790                            | 6.49        |                  | 1.15E-05        | 6.86E-03        | 116 kDa U5 small nuclear ribonucleoprotein component          | 0.12          | 0.04          | 0.28          | 1.11          | 0.51          | 0.00         | 0.01         | 0.00         | 0.00         |  |
| 0046260                            | 6.27        |                  | 1.04E-05        | 6.47E-03        | -                                                             | 1.09          | 0.67          | 0.04          | 5.98          | 2.21          | 0.05         | 0.01         | 0.00         | 0.05         |  |
| 0104260                            | 6.11        |                  | 1.04E-04        | 4E-02           | -                                                             | 0.03          | 3.65          | 6.95          | 0.76          | 0.87          | 0.00         | 0.06         | 0.00         | 0.08         |  |
| 0042070                            | 5.36        |                  | 1.98E-06        | 2.61E-03        | -                                                             | 3.76          | 1.70          | 2.69          | 4.87          | 3.93          | 0.00         | 0.32         | 0.00         | 0.00         |  |
| 0106620                            | 4.93        |                  | 2.12E-05        | 1.20E-02        | -                                                             | 5.45          | 1.62          | 0.16          | 4.82          | 7.85          | 0.18         | 0.01         | 0.27         | 0.06         |  |
| 0060410                            | 4.57        |                  | 2.00E-07        | 3.40E-04        | Phosphatidylinositol 4-phosphate 5-kinase 9                   | 0.56          | 0.63          | 0.30          | 1.36          | 1.16          | 0.03         | 0.02         | 0.04         | 0.05         |  |
| 0036200                            | 4.40        |                  | 3.95E-06        | 3.71E-03        | Delta(12) fatty acid desaturase fat-2                         | 8.64          | 3.56          | 3.13          | 41.55         | 58.31         | 1.91         | 0.77         | 1.20         | 0.59         |  |
| <b><u>0122240</u></b> <sup>^</sup> | <b>4.33</b> | <b>3.7 ± 2.6</b> | <b>4.88E-13</b> | <b>1.45E-09</b> | <b>LRR receptor-like serine/threonine-protein kinase GSO1</b> | <b>54.12</b>  | <b>166.19</b> | <b>105.89</b> | <b>113.59</b> | <b>143.65</b> | <b>4.97</b>  | <b>11.03</b> | <b>4.83</b>  | <b>3.82</b>  |  |
| 0108790                            | 3.84        |                  | 4.33E-06        | 3.71E-03        | -                                                             | 6.91          | 3.05          | 1.57          | 5.84          | 2.35          | 0.20         | 0.39         | 0.47         | 0.07         |  |
| <b><u>0024820</u></b> <sup>^</sup> | <b>3.06</b> | <b>9.8 ± 3</b>   | <b>1.10E-04</b> | <b>4.06E-02</b> | -                                                             | <b>173.97</b> | <b>306.15</b> | <b>214.05</b> | <b>181.47</b> | <b>225.29</b> | <b>25.26</b> | <b>4.72</b>  | <b>65.51</b> | <b>10.19</b> |  |
| 0068000                            | 2.40        |                  | 7.79E-06        | 5.61E-03        | Elongation of very long chain fatty acids protein 5           | 19.39         | 25.93         | 19.36         | 22.20         | 28.41         | 3.45         | 7.52         | 5.69         | 1.59         |  |
| 0113990                            | 2.39        |                  | 9.98E-05        | 4E-02           | -                                                             | 11.87         | 5.32          | 12.44         | 4.00          | 6.78          | 1.21         | 2.68         | 1.84         | 0.65         |  |
| 0025090                            | 2.07        |                  | 4.88E-05        | 2.23E-02        | -                                                             | 17.00         | 26.45         | 20.64         | 39.55         | 27.55         | 8.35         | 9.32         | 6.86         | 2.17         |  |
| 0091290                            | 1.91        |                  | 3.39E-05        | 1.75E-02        | -                                                             | 31.09         | 21.97         | 24.83         | 27.49         | 42.03         | 13.60        | 7.36         | 9.16         | 3.41         |  |

| Gene ID                        | logFC        | qPCR FC           |                 |                 | Description                                                                | MT+          |             |             |              |              | MT-           |               |               |               |
|--------------------------------|--------------|-------------------|-----------------|-----------------|----------------------------------------------------------------------------|--------------|-------------|-------------|--------------|--------------|---------------|---------------|---------------|---------------|
|                                |              | ± variance        | p-Value         | FDR             |                                                                            | B938         | B856        | B856        | Sy373        | Sy373        | B857          | B857          | B939          | Sy379         |
|                                |              |                   |                 |                 |                                                                            | Lib41        | Lib74       | Lib HCUH    | Lib CIIO1    | Lib CIIO2    | Lib45         | Lib HCUN      | Lib77         | Lib CIIIP2    |
| <b><u>0085380^/0041130</u></b> | *            | <b>-6.6 ± 0.8</b> |                 |                 | <b>Heat shock factor protein 3</b>                                         | 0            | 0           | 0           | 0            | 0            | 0             | 0             | 0             | 0             |
| <b><u>0006960^</u></b>         | <b>-8.17</b> | <b>-9.7 ± 4.6</b> | <b>1.76E-16</b> | <b>1.04E-12</b> | <b>Probable leucine-rich repeat receptor-like protein kinase At1g35710</b> | <b>0.58</b>  | <b>1.21</b> | <b>0.20</b> | <b>0.09</b>  | <b>0.18</b>  | <b>101.66</b> | <b>179.60</b> | <b>232.77</b> | <b>59.40</b>  |
| 0081520                        | -8.04        |                   | 4.44E-10        | 8.79E-07        | Myb-related protein Zm38                                                   | 0.00         | 0.00        | 0.00        | 0.00         | 0.00         | 2.22          | 0.65          | 0.40          | 1.08          |
| 0052370                        | -6.21        |                   | 1.04E-04        | 4E-02           | Phosphoenolpyruvate carboxykinase ATP                                      | 0.46         | 1.06        | 1.11        | 3.50         | 6.95         | 4.34          | 0.80          | 8.63          | 689.14        |
| 0020420                        | -5.11        |                   | 8.45E-07        | 1.25E-03        | -                                                                          | 3.18         | 2.86        | 0.68        | 0.74         | 1.13         | 4.33          | 186.77        | 56.10         | 10.26         |
| 0103000                        | -4.72        |                   | 7.36E-06        | 5.61E-03        | Cathepsin D                                                                | 1.37         | 1.75        | 0.06        | 0.97         | 1.50         | 4.76          | 63.40         | 52.07         | 2.92          |
| <b>0045400</b>                 | <b>-4.60</b> | <b>0.2 ± 1.4</b>  | <b>1.01E-05</b> | <b>6.47E-03</b> | <b>Putative oxidoreductase YteT</b>                                        | <b>2.04</b>  | <b>0.74</b> | <b>6.14</b> | <b>5.04</b>  | <b>8.54</b>  | <b>31.63</b>  | <b>17.37</b>  | <b>13.04</b>  | <b>342.54</b> |
| 0045410                        | -4.57        |                   | 6.59E-05        | 2.90E-02        | Probable NAD(P)H-dependent D-xylose reductase xyl1                         | 1.23         | 0.39        | 5.18        | 6.90         | 8.90         | 30.75         | 9.37          | 13.73         | 342.07        |
| <b>0021670</b>                 | <b>-4.20</b> | <b>0 ± 1.4</b>    | <b>3.04E-06</b> | <b>3.28E-03</b> | -                                                                          | <b>3.18</b>  | <b>2.06</b> | <b>2.26</b> | <b>3.48</b>  | <b>5.26</b>  | <b>29.99</b>  | <b>3.23</b>   | <b>23.23</b>  | <b>174.72</b> |
| <b>0093550</b>                 | <b>-4.01</b> | <b>0 ± 1</b>      | <b>8.04E-06</b> | <b>5.61E-03</b> | -                                                                          | <b>36.61</b> | <b>1.00</b> | <b>5.36</b> | <b>11.26</b> | <b>12.39</b> | <b>223.97</b> | <b>39.82</b>  | <b>279.09</b> | <b>320.40</b> |
| <b>0084970</b>                 | <b>-3.05</b> | <b>0 ± 43</b>     | <b>1.84E-10</b> | <b>4.37E-07</b> | -                                                                          | <b>1.64</b>  | <b>1.05</b> | <b>2.52</b> | <b>2.61</b>  | <b>1.71</b>  | <b>11.81</b>  | <b>21.78</b>  | <b>10.58</b>  | <b>20.34</b>  |
| 0076430                        | -2.96        |                   | 1.41E-04        | 4.82E-02        | Glutamate synthase large subunit-like protein YerD                         | 14.83        | 1.24        | 6.34        | 8.94         | 13.21        | 53.01         | 9.63          | 75.93         | 130.69        |
| 0057230                        | -2.81        |                   | 4.66E-05        | 2.21E-02        | -                                                                          | 0.92         | 1.60        | 1.45        | 3.33         | 2.06         | 25.46         | 8.90          | 2.83          | 20.12         |
| 0004160                        | -2.51        |                   | 3.06E-05        | 1.65E-02        | -                                                                          | 7.24         | 3.43        | 8.79        | 4.84         | 7.38         | 19.65         | 9.73          | 44.16         | 65.34         |
| 0038950                        | -2.41        |                   | 1.30E-04        | 4.69E-02        | -                                                                          | 4.40         | 1.67        | 12.32       | 2.32         | 3.49         | 25.58         | 21.24         | 43.10         | 12.16         |
| 0072100                        | -2.27        |                   | 1.42E-04        | 4.82E-02        | Tetracycline resistance protein class A                                    | 6.30         | 3.41        | 2.75        | 7.18         | 5.25         | 26.61         | 5.47          | 43.26         | 21.20         |
| 0078000                        | -2.19        |                   | 7.61E-05        | 3.23E-02        | -                                                                          | 1.95         | 1.99        | 5.21        | 1.47         | 2.20         | 10.47         | 10.75         | 18.06         | 7.90          |
| 0113630                        | -2.03        |                   | 4.37E-06        | 3.71E-03        | Protein cereblon                                                           | 2.76         | 1.64        | 2.32        | 2.92         | 2.08         | 15.44         | 12.96         | 6.17          | 7.22          |

\* This gene (two identical gene models) was not present in the output of the differential expression analysis because of a filter on multimapping reads. It has been tested based on its expression profile during the early stages of *P. multistriata* sexual reproduction<sup>1</sup>.

**Supplementary Table 2. *P. multistriata* strains used in this study.** The strain name, mating type defined in experimental crosses, isolation date, origin (environment or lab crosses) and the bands obtained in the genotyping PCR are given, along with the information on whether a given strain has been used for the qPCR analyses, for RNA-seq and/or to clone and sequence the alleles. >SST or < SST = above or below the sexualization size threshold.

| Strain name     | Mating Type | Isolation date | Origin/Parental strains    | Genotyping PCR result | qPCR | RNA-seq | Alleles cloned and sequenced |
|-----------------|-------------|----------------|----------------------------|-----------------------|------|---------|------------------------------|
| B935            | +           | 24/05/2012     | isolated from water sample |                       | X    |         |                              |
| SH18            | +           | 07/04/2013     | Sy776-*SP2+                |                       | X    |         |                              |
| MVR1041.6       | +           | 05/02/2013     | isolated from water sample |                       | X    |         |                              |
| MVR171.8        | +           | 07/06/2013     | isolated from water sample |                       | X    |         |                              |
| B936            | -           | 24/05/2012     | isolated from water sample | MB                    | X    |         |                              |
| SH20            | -           | 07/04/2013     | Sy776-*SP2+                |                       | X    |         |                              |
| MVR1041.4       | -           | 05/02/2013     | isolated from water sample | M                     | X    |         |                              |
| MVR171.1        | -           | 07/06/2013     | isolated from water sample |                       | X    |         |                              |
| 1119-15         | +           | 02/09/2014     | isolated from water sample | AM                    |      |         | X                            |
| 1120-32         | -           | 09/09/2014     | isolated from water sample | M                     |      |         | X                            |
| 1078-30         | +           | 28/10/2013     | isolated from water sample | AB                    |      |         | X                            |
| 1120-47         | -           | 02/09/2014     | isolated from water sample | MB                    |      |         |                              |
| 1120-48         | -           | 09/09/2014     | isolated from water sample | MB                    |      |         | X                            |
| 1075-25         | +           | 08/10/2013     | isolated from water sample | AB                    |      |         |                              |
| 1120-5          | +           | 02/09/2014     | isolated from water sample | A                     |      |         |                              |
| 1120-25         | +           | 02/09/2014     | isolated from water sample | AB                    |      |         |                              |
| 1120-7          | -           | 02/09/2014     | isolated from water sample | B                     |      |         |                              |
| 1120 14         | -           | 02/09/2014     | isolated from water sample | B                     |      |         |                              |
| Sy373           | +           | 07/07/2009     | isolated from water sample | AM                    |      | X       |                              |
| Sy379           | -           | 07/07/2009     | isolated from water sample |                       |      | X       |                              |
| B854 (A13)      | -           | 13/10/2010     | Sy373xSy379                | M                     |      |         |                              |
| B855 (A1.6)     | +           | 13/10/2010     | Sy373xSy379                | AB                    |      |         |                              |
| VF2.2.9/11      | -           | 02/08/2011     | B855 x B854                | MB                    |      |         |                              |
| B857 (VF2.5.11) | -           | 02/08/2011     | B855 x B854                | MB                    |      | X       | X                            |
| VF2.1.9         | +           | 02/08/2011     | B855 x B854                | AM                    |      |         |                              |
| B856 (VF2.3.5)  | +           | 02/08/2011     | B855 x B854                | AM                    |      | X       | X                            |
| PmF3.2          | +           | 2012           | B856 x ?                   | A                     |      |         |                              |
| LV 77           | -           | 2015           | B855 x MVR1041.4           | B                     |      |         |                              |
| LV 80           | +           | 2015           | B855 x MVR1041.4           | AM                    |      |         |                              |
| LV 84           | -           | 2015           | B855 x MVR1041.4           | B                     |      |         |                              |
| LV 88           |             | 2015           | B855 x MVR1041.4           | B                     |      |         |                              |
| LV 89           | +           | 2015           | B855 x MVR1041.4           | A                     |      |         |                              |
| LV 91           | +           | 2015           | B855 x MVR1041.4           | AM                    |      |         |                              |
| LV 92A          | -           | 2015           | B855 x MVR1041.4           | MB                    |      |         |                              |

**Supplementary Table 2 continued**

|              |                 |            |                            |     |   |   |   |
|--------------|-----------------|------------|----------------------------|-----|---|---|---|
| LV 106       |                 | 2015       | B855 x MVR1041.4           | B   |   |   |   |
| LV 112       |                 | 2015       | B855 x MVR1041.4           | B   |   |   |   |
| LV 113       | -               | 2015       | B855 x MVR1041.4           | B   |   |   | X |
| LV 117       | -               | 2015       | B855 x MVR1041.4           | MB  |   |   |   |
| LV 121       | +               | 2015       | B855 x MVR1041.4           | AM  |   |   | X |
| LV 122       | -               | 2015       | B855 x MVR1041.4           | MB  |   |   |   |
| LV 123       | -               | 2015       | B855 x MVR1041.4           | B   |   |   |   |
| LV 125       | +               | 2015       | B855 x MVR1041.4           | AM  |   |   |   |
| LV 127       | +               | 2015       | B855 x MVR1041.4           | AM  |   |   |   |
| LV 129       | -               | 2015       | B855 x MVR1041.4           | B   |   |   |   |
| LV 130       | +               | 2015       | B855 x MVR1041.4           | A   |   |   | X |
| LV 136       | -               | 2015       | B855 x MVR1041.4           | B   | X | X |   |
| LV 141       | +               | 2015       | B855 x MVR1041.4           | A   |   |   |   |
| LV 142       | -               | 2015       | B855 x MVR1041.4           | MB  |   |   |   |
| LV 148       | -               | 2015       | B855 x MVR1041.4           | B   |   |   |   |
| LV 149       | +               | 2015       | B855 x MVR1041.4           | AM  |   |   |   |
| LV 162       | +               | 2015       | B855 x MVR1041.4           | AM  |   |   |   |
| LV 164       | -               | 2015       | B855 x MVR1041.4           | MB  |   |   |   |
| LV 168       | +               | 2015       | B855 x MVR1041.4           | A   |   |   |   |
| LV 169       | -               | 2015       | B855 x MVR1041.4           | MB  |   |   |   |
| LV 175       | +               | 2015       | B855 x MVR1041.4           | A   |   |   |   |
| LV 177       | +               | 2015       | B855 x MVR1041.4           | AM  |   |   | X |
| LV 179       | +               | 2015       | B855 x MVR1041.4           | A   |   |   |   |
| LV 180       | +               | 2015       | B855 x MVR1041.4           | A   |   |   |   |
| LV 181       | -               | 2015       | B855 x MVR1041.4           | B   |   |   |   |
| LV 182       | +               | 2015       | B855 x MVR1041.4           | A   |   |   |   |
| LV 186       | -               | 2015       | B855 x MVR1041.4           | MB  |   |   |   |
| LV 193       | -               | 2015       | B855 x MVR1041.4           | B   |   |   |   |
| LV 195       | +               | 2015       | B855 x MVR1041.4           | AM  |   |   |   |
| MC 1217 (11) | +               | 13/09/2016 | isolated from water sample | -   |   |   |   |
| MC 1217 (13) | -               | 13/09/2016 | isolated from water sample | -   |   |   |   |
| MC 1217 (17) | -               | 13/09/2016 | isolated from water sample | M/B |   |   |   |
| F4 B1 >SST   | NC. - when <SST | 06/12/2016 | PmF3.2 x MC 1217 13        | M   |   |   |   |
| F4 B2 >SST   | NC. - when <SST | 06/12/2016 | PmF3.2 x MC 1217 13        | M   |   |   |   |
| F4 B3 >SST   | NC. + when <SST | 06/12/2016 | PmF3.2 x MC 1217 13        | AM  |   |   |   |
| F4 B4 >SST   | NC              | 06/12/2016 | PmF3.2 x MC 1217 13        | AM  |   |   |   |

**Supplementary Table 2 continued**

|               |                       |            |                            |    |  |  |  |
|---------------|-----------------------|------------|----------------------------|----|--|--|--|
| F4 B5 >SST    | NC                    | 06/12/2016 | PmF3.2 x MC 1217 13        | M  |  |  |  |
| B6 >SST       | NC                    | 06/12/2016 | MC 1217 11 x MC 1217 13    | AM |  |  |  |
| B7 >SST       | NC                    | 06/12/2016 | MC 1217 11 x MC 1217 13    | MB |  |  |  |
| B8 >SST       | NC                    | 06/12/2016 | MC 1217 11 x MC 1217 13    | AM |  |  |  |
| B9 >SST       | NC. -<br>when<br><SST | 06/12/2016 | MC 1217 11 x MC 1217 13    | MB |  |  |  |
| B10 >SST      | NC. +<br>when<br><SST | 06/12/2016 | MC 1217 11 x MC 1217 13    | AM |  |  |  |
| Sy682         | -                     | 07/09/2010 | isolated from water sample | MB |  |  |  |
| Sy799         | -                     | 21/09/2010 | isolated from water sample | B  |  |  |  |
| Sy800         | +                     | 21/09/2010 | isolated from water sample | B  |  |  |  |
| Sy798         | +                     | 21/09/2010 | isolated from water sample | AM |  |  |  |
| MM1A1         | NT                    | 2011       | isolated from water sample | M  |  |  |  |
| ES814         | +                     | 2011       | isolated from water sample | AB |  |  |  |
| 1068 13       | -                     | 20/08/2013 | isolated from water sample | B  |  |  |  |
| 1068 14       | -                     | 20/08/2013 | isolated from water sample | B  |  |  |  |
| 1068 33       | +                     | 20/08/2013 | isolated from water sample | AB |  |  |  |
| 1068 81       | -                     | 20/08/2013 | isolated from water sample | MB |  |  |  |
| 1070 14       | +                     | 03/09/2013 | isolated from water sample | AB |  |  |  |
| 1070 13       | +                     | 03/09/2013 | isolated from water sample | AB |  |  |  |
| 1068 57       | +                     | 20/08/2013 | isolated from water sample | AB |  |  |  |
| 1264 B3a      | +                     | 29/08/2017 | isolated from water sample | AM |  |  |  |
| 1264 B4       | +                     | 29/08/2017 | isolated from water sample | AB |  |  |  |
| 1266 B3a      | -                     | 13/09/2017 | isolated from water sample | B  |  |  |  |
| 1266 B4b      | +                     | 13/09/2017 | isolated from water sample | AB |  |  |  |
| KA105<br>>SST | NC                    | 28/06/2017 | MC1217-17 x MC1217-5       | AM |  |  |  |
| KA204<br>>SST | NC                    | 28/06/2017 | MC1217-17 x LV168          | AB |  |  |  |
| MR3 >SST      | NC                    | 21/06/2017 | LV92A5 x PMF3.2            | MB |  |  |  |
| MR5 >SST      | NC                    | 21/06/2017 | LV92A5 x PMF3.3            | AB |  |  |  |

NC= non-competent for sex because cell size was above sexualization threshold.

NT = not tested, dead, only gDNA available.

**Supplementary Table 3.** Cycle Threshold (CT) values (technical triplicates and average) from qPCR amplification of the control gene tubulin- $\beta$  (TUB B) and of the gene 0020760.

| <b>Strain name and MT</b> | <b>TUB B</b> | <b>TUB B average CT</b> | <b>20760</b> | <b>20760 average CT</b> |
|---------------------------|--------------|-------------------------|--------------|-------------------------|
| <b>SP4 MT-</b>            | 21.43401     | 21.397765               | 27.72913     | 27.575966               |
|                           | 21.3896      |                         | 27.54986     |                         |
|                           | 21.36968     |                         | 27.4489      |                         |
| <b>SH20 MT-</b>           | 22.10721     | 22.367543               | 29.3734      | 29.55899                |
|                           | 22.29175     |                         | 30.14509     |                         |
|                           | 22.70367     |                         | 29.15848     |                         |
| <b>41.4 MT-</b>           | 19.07514     | 19.224321               | 24.45341     | 24.456882               |
|                           | 19.3061      |                         | 24.44812     |                         |
|                           | 19.29172     |                         | 24.46911     |                         |
| <b>171.1 MT-</b>          | 21.69194     | 21.717037               | 33.27479     | 33.123839               |
|                           | 21.77249     |                         | 33.12741     |                         |
|                           | 21.68668     |                         | 32.96932     |                         |
| <b>SP2 MT+</b>            | 22.96304     | 22.933743               | 36.44473     | 37.115078               |
|                           | 22.96545     |                         | 37.78543     |                         |
|                           | 22.87274     |                         | ND           |                         |
| <b>SH18 MT+</b>           | 21.73822     | 21.712673               | 27.16025     | 27.188158               |
|                           | 21.91142     |                         | 27.05754     |                         |
|                           | 21.48838     |                         | 27.34668     |                         |
| <b>41.6 MT+</b>           | 20.25243     | 20.28755                | 32.44352     | 32.619483               |
|                           | 20.33863     |                         | 32.15172     |                         |
|                           | 20.27159     |                         | 33.26321     |                         |
| <b>171.8 MT+</b>          | 23.14835     | 23.120984               | 29.08989     | 29.242554               |
|                           | 23.03572     |                         | 29.07984     |                         |
|                           | 23.17888     |                         | 29.55793     |                         |

ND, not determined

**Supplementary Table 4.** List of genes differentially expressed in the transgenic strain LV136T3 compared to the wild type strain LV136. Two new putative MR genes are indicated in bold.

| Gene ID     | logFC | logCPM | PValue    | FDR       | Gene name          |
|-------------|-------|--------|-----------|-----------|--------------------|
| 0020770.1   | 10.84 | 4.77   | 5.763E-21 | 5.397E-17 | <i>MRP3</i>        |
| 0024810.1   | 10.40 | 9.18   | 1.316E-11 | 3.081E-08 | <i>MRP1</i>        |
| 0122240.1   | 4.57  | 6.65   | 1.161E-08 | 2.174E-05 | <i>MRP2</i>        |
| 0070330.1   | -2.62 | 5.17   | 2.313E-05 | 2.708E-02 | <b><i>MRX1</i></b> |
| 0058000.1 * | -3.27 | 3.53   | 3.516E-05 | 3.297E-02 | <b><i>MRX2</i></b> |
| 0036960.1 * | -3.27 | 3.53   | 3.520E-05 | 3.297E-02 | <b><i>MRX2</i></b> |
| 0041130.1 ° | -5.88 | 3.72   | 3.889E-08 | 5.203E-05 | <i>MRM1</i>        |
| 0085380.1 ° | -5.88 | 3.72   | 3.868E-08 | 5.203E-05 | <i>MRM1</i>        |
| 0006960.1 ^ | -6.37 | 5.77   | 6.725E-13 | 2.099E-09 | <i>MRM2</i>        |
| 0006960.2 ^ | -6.37 | 5.77   | 6.705E-13 | 2.099E-09 | <i>MRM2</i>        |

Gene models marked with identical symbols are either isoforms (^) or are identical but map on two different scaffolds (\* and °).



**Supplementary Table 5.** Libraries selected for the differential expression analysis with corresponding strain code, strain Mating Type (MT), accession number, reference, sequencing strategy, number of reads before and after the quality check (QC).

| <b>Library Name</b> | <b>Strain code</b> | <b>MT</b> | <b>Accession number</b> | <b>Reference</b> | <b>Strategy</b> | <b>Reads before QC</b> | <b>Reads after QC</b> |
|---------------------|--------------------|-----------|-------------------------|------------------|-----------------|------------------------|-----------------------|
| 41                  | B938               | +         | E-MTAB-5469             | <sup>1</sup>     | Single-end      | 28.458.025             | 28.341.225            |
| 45                  | B857               | -         | E-MTAB-5469             | <sup>1</sup>     | Single-end      | 34.070.601             | 33.766.714            |
| 74                  | B856               | +         | E-MTAB-5469             | <sup>1</sup>     | Single-end      | 19.270.248             | 19.194.720            |
| 77                  | B939               | -         | E-MTAB-5469             | <sup>1</sup>     | Single-end      | 27.925.811             | 27.652.379            |
| CIIO1               | Sy373              | +         | SRX059292               | Unpublished      | Paired-end      | 42.736.393             | 35.243.577            |
| CIIO2               | Sy373              | +         | SRX115126               | <sup>2</sup>     | Paired-end      | 26.423.748             | 22.914.921            |
| CIIP2               | Sy379              | -         | SRX115125               | <sup>2</sup>     | Paired-end      | 30.856.367             | 20.823.225            |
| HCUH                | B856               | +         | SRX1070747              | Unpublished      | Paired-end      | 54.545.126             | 50.297.563            |
| HCUN                | B857               | -         | SRX1070749              | Unpublished      | Paired-end      | 52.851.954             | 48.670.573            |

**Supplementary Table 6.** List of primers used in this study and corresponding sequences.

| <b>Primer name</b> | <b>Location</b>                        | <b>Primer sequence 5'-3'</b>      |
|--------------------|----------------------------------------|-----------------------------------|
| F147prom           | <i>MRP3</i> promoter                   | GGCAACAAGTGCTTGCTAATG             |
| R147prom           | <i>MRP3</i> promoter                   | GATGATGTACAACAATCGGCG             |
| R147p2             | <i>MRP3</i> promoter                   | GGGTCTACGTACGGTATGGTG             |
| F147p2             | <i>MRP3</i> promoter                   | CAATCCTACATAGGCCCAATATC           |
| SC432promFW        | <i>MRM1</i> promoter                   | GAGTTCTCTTGCCGGATGATAC            |
| SC432promRV        | <i>MRM1</i> promoter                   | CCCTCATTCACCACATGTGAC             |
| 0020770+ F         | <i>MRP3</i> coding region              | GCGCAAGCAATCTAAGGTG               |
| 0020770+ R         | <i>MRP3</i> coding region              | GACGTGACGGCTATTTTG                |
| F147p3             | <i>MRP3</i> promoter                   | GGATCCTTTGAGCAACACAG              |
| R147p3             | <i>MRP3</i> promoter                   | CCAAGTGATGCTGCATAACAAG            |
| 0.00+F             | <i>MRP1</i> coding region              | GTATGGCGCTCACCCTTC                |
| 0.00+R             | <i>MRP1</i> coding region              | CGTCTTCGACTGCGTCTTC               |
| 127.15 F3          | <i>MRP2</i> coding region              | CCTCCGAATATGGATAACATG             |
| 127.15 R3          | <i>MRP2</i> coding region              | GAGCTAAACATCGTGACACC              |
| 47507F             | <i>MRM1</i> coding region              | CCCCTACAAGCTCTTTGATTTG            |
| 47507R             | <i>MRM1</i> coding region              | GAAATTGTGGTGCCCAAAG               |
| 46228F             | <i>MRM2</i> coding region              | CCACCGAACTAGGCAACTGTC             |
| 46228R             | <i>MRM2</i> coding region              | GGCACAGAACCCGTC AAC               |
| FMrp3Eco           | <i>MRP3</i> expressing vector          | GGCGGCCGAATTCATGAATGACGAATCGAAT   |
| RMrp3Sma           | <i>MRP3</i> expressing vector          | GGCGGCCCCCGGGCTACATCTGCTGCATTAG   |
| FPIH4              | NAT expressing vector                  | AAAGCTACTAGTGGCCATTTTGGAATTTGTCG  |
| RPIH4              | NAT expressing vector                  | TCGACTACCTCAGTCTTCGGCTCTAGAATGACC |
| FPIIH4             | NAT expressing vector                  | TCGGCTCTAGAATGACCACTCTTGACGACACG  |
| RPIIH4             | NAT expressing vector                  | TCGACTACCTCAGTCTTCGGCTCTAGAATGACC |
| H4up1              | <i>MRP3</i> and NAT expressing vectors | GTGGGAATGAACAGAACGAGA             |
| NATfor             | NAT expressing vector                  | TGACCACTCTTGACGACACG              |
| NATrev             | NAT expressing vector                  | GTTGACGTTGGTGACCTCC               |
| tArev              | <i>MRP3</i> and NAT expressing vectors | CCCAGCCAAAGTCGAGGTAG              |

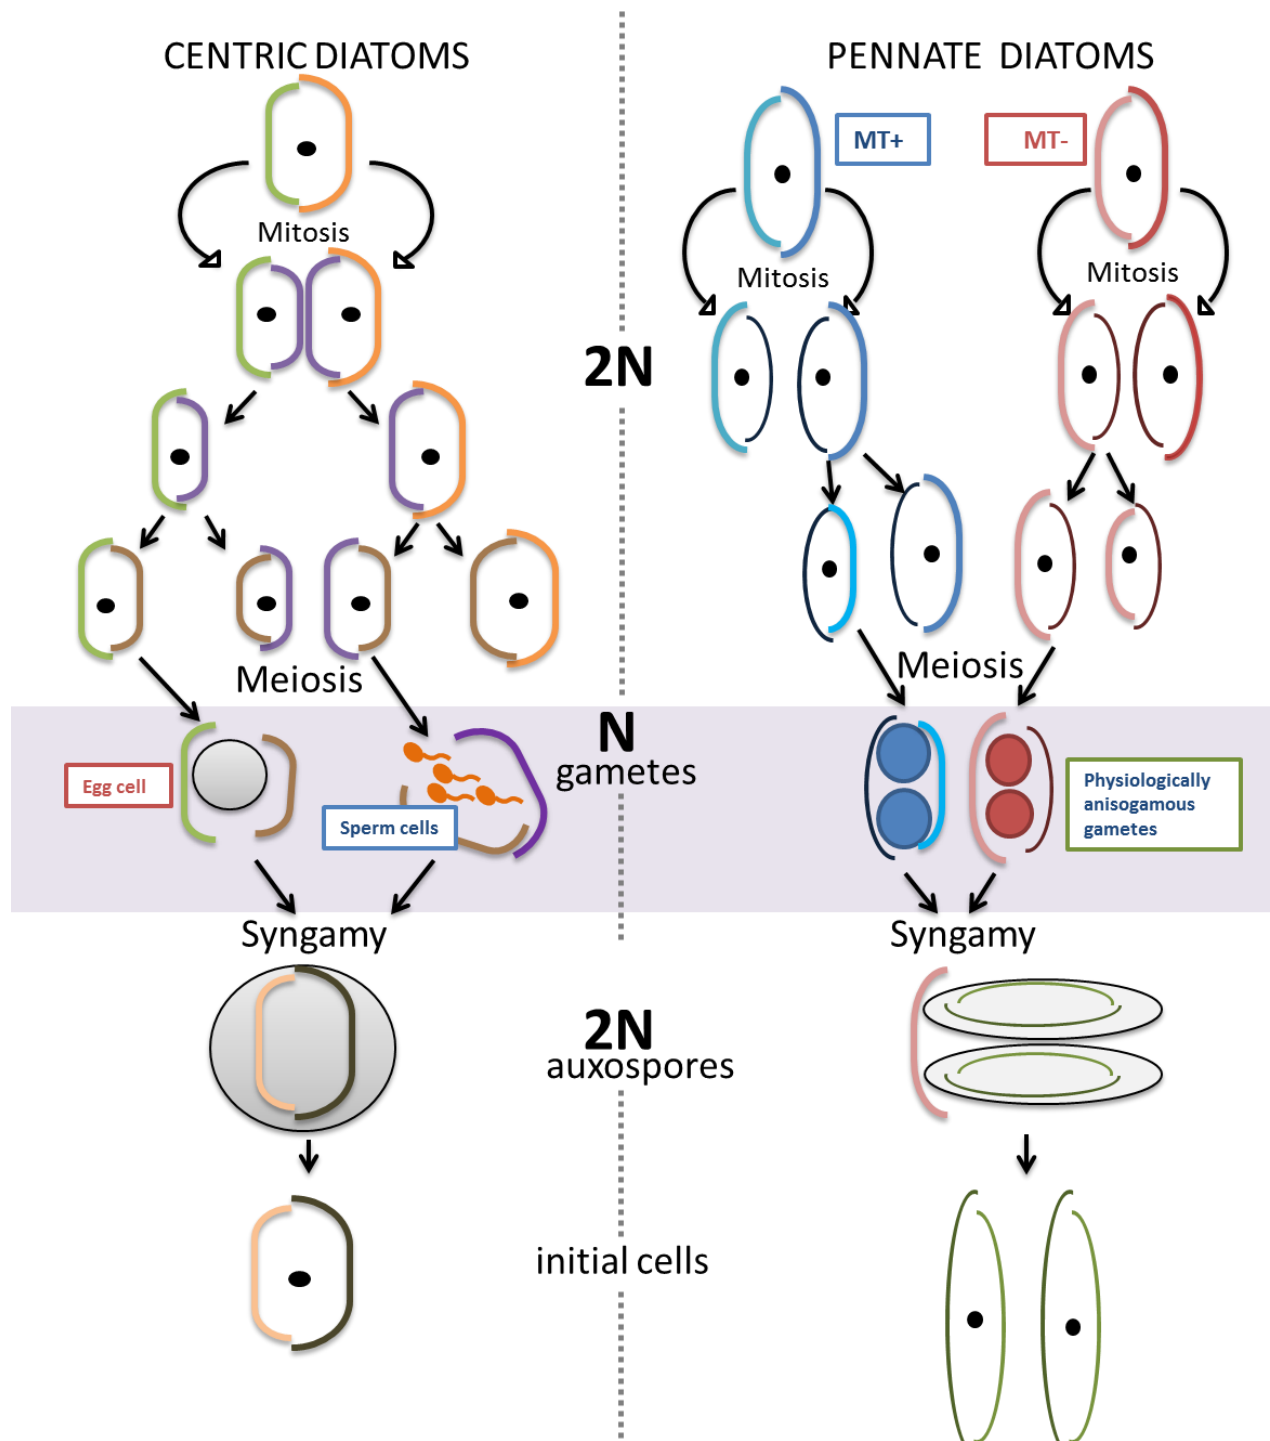

**Supplementary Figure 1.** Schematic representation of the life cycle in centric (left) and pennate (right) diatoms. Diatoms are diploid ( $2N$ ) and gametes are the only haploid ( $N$ ) stage in their life cycle. Centric diatoms are homothallic and anisogamous, while pennate diatoms are mostly heterothallic and isogamous or physiologically anisogamous. Auxospores, not surrounded by the rigid siliceous frustule, can expand, and within them the maximum sized initial cell is produced. This cell will start dividing mitotically.

## SignalP output

SignalP-4.1 prediction (euk networks): MRP1

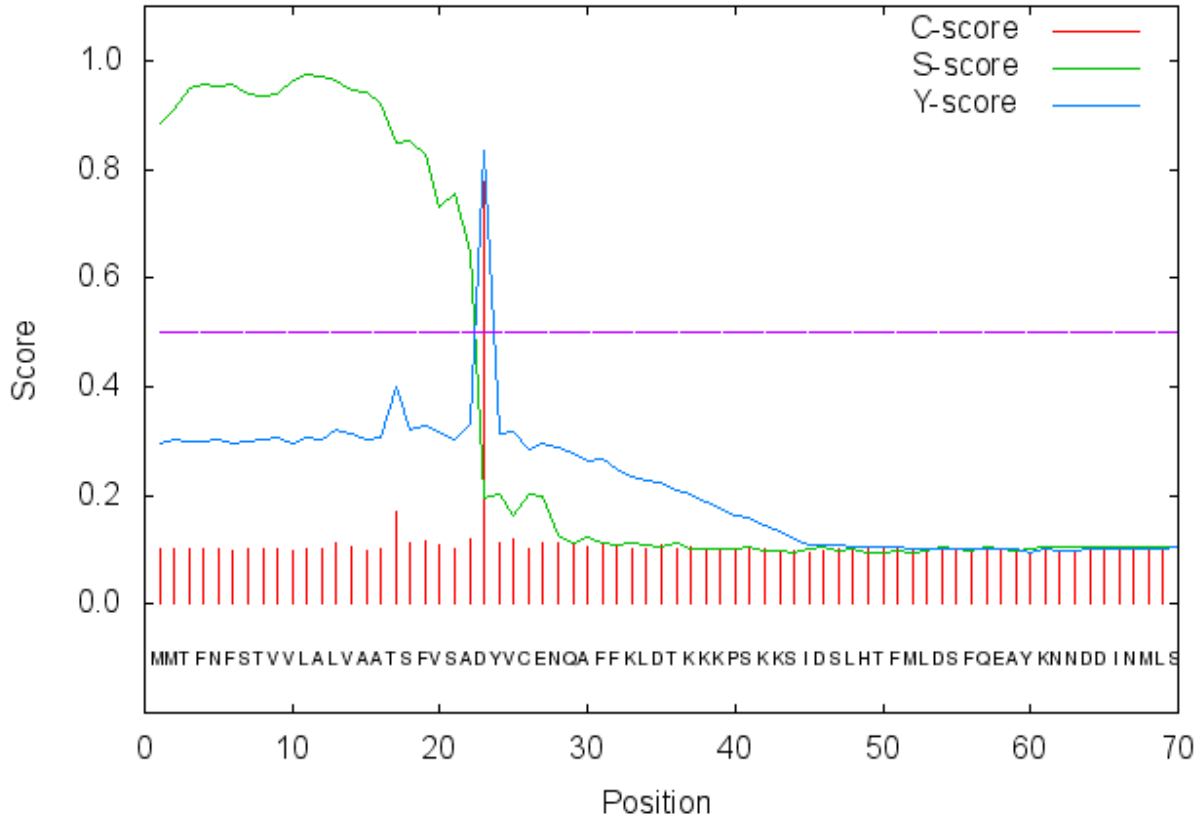

| # Measure | Position | Value | Cutoff | signal peptide? |
|-----------|----------|-------|--------|-----------------|
| max. C    | 23       | 0.778 |        |                 |
| max. Y    | 23       | 0.836 |        |                 |
| max. S    | 11       | 0.975 |        |                 |
| mean S    | 1-22     | 0.899 |        |                 |
| D         | 1-22     | 0.870 | 0.450  | YES             |

Name=MRP1 SP='YES' Cleavage site between pos. 22 and 23: VSA-DY D=0.870  
D-cutoff=0.450 Networks=SignalP-noTM

# [data](#)

# [gnuplot script](#)

## AsaFind output

This is ASAFind version 1.1.5.

You used SignalP-4.1.

You submitted 1 proteins

0 of your proteins were SignalP negative

1 of your proteins were SignalP positive

0 of these were predicted to go to the plastid

0 of these were predicted with high confidence

0 of these were predicted with with low confidence

**Supplementary Figure 2. Outputs of prediction software for transit peptides for the MRP1 protein.** Top, output of the SignalP 4.0 software, which can predict the presence of a secretory signal peptide, a ubiquitous protein sorting signal that targets proteins for translocation across the endoplasmic reticulum (ER) membrane. Bottom, output of the AsaFind software, a prediction tool that identifies proteins with a signal peptide for transport to diatom plastids. The MRP1 protein contains a signal peptide but it is not predicted to go to the plastid.

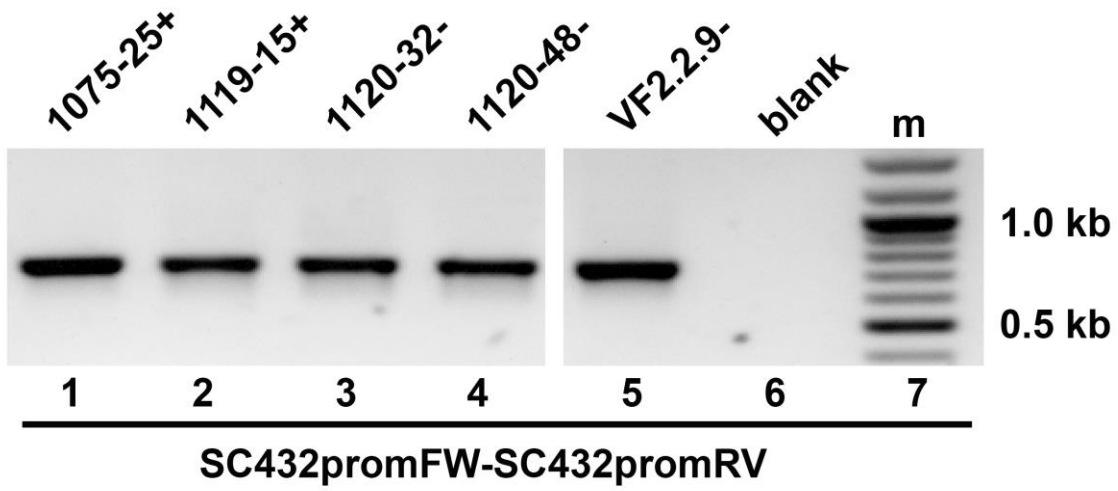

**Supplementary Figure 3. PCR amplification of a 728 bp region upstream of the *MRMI* gene.** Electrophoretic gel with amplicons obtained from two MT+ and three MT- strains.

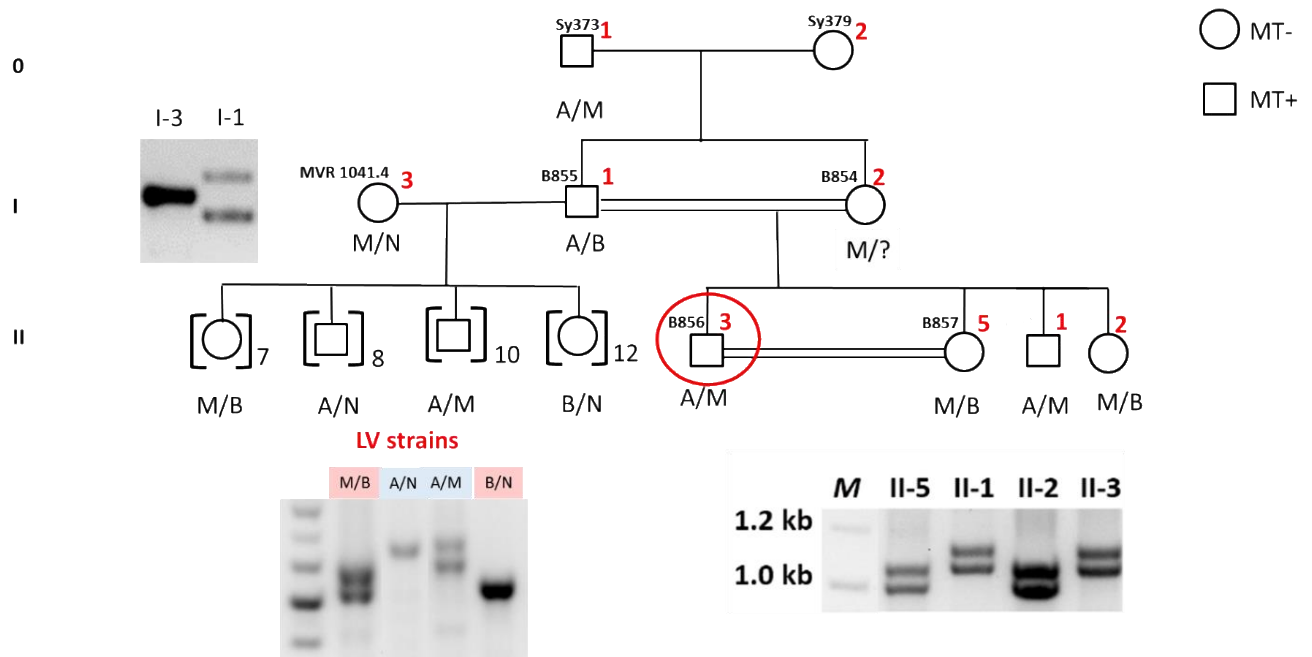

**Supplementary Figure 4. The A allele segregates with the MT+ phenotype.** *P. multistriata* pedigree with three generations. Each individual is represented by a square for MT+ or a circle for MT- and is defined by the generation number (in Roman on the left panel) and a progressive Arabic number (in red). Strain names are reported above each square or circle when available. The alleles of each individual are indicated below the symbol. The question mark indicates uncertainty on the second allele. In generation II subscript numbers next to brackets indicate how many individuals of that MT with that genotype were obtained from the cross of I-1 and I-3. Electropherograms show bands obtained from a selection of individuals in the pedigree. For all other genotypes refer to Supplementary Table 2. The strain circled in red was used to produce the reference genome<sup>1</sup>.







AGCAAAATCAGATGCGCGTGAAAATATTTGGTCAGCAAGAGCACGCAAAACTATTTGGTT  
GCAAGGAATAAAATTTGAGCACGTTT  
>N\_allele  
ATGACACATACTATGGGAACAGAGGtAAGTACCACCTAAAGACACTTtTTATTATTGTAC  
TCATAACTGATTCCAGATTCGTGCCACACGTTTCTATCTACCACCATAACCGTACGTAGAC  
CCACATCAAGTAAACAATTAATGGGGTCAAGTAAGAACTTGAAAACCTACCATTACCAAC  
ACAACCAGAGAAATGGCGTTTATTCTTGTGTTTTTGTCTGACGGCTTCTGCACAATGGTA  
GCAACGTAGATTAAGAGAGGACTGAACCAATTGAATCGCTGATTGGACCCGGGAGCCTTT  
TTTGTTCaAGACACTGGACAAGGCTTAAACGATTTTTGAGTAGGAGTATGTGCCTTTTTT  
CTTcATCACAGATCATGTTCAAGGAGGAAGAATAATACTACGAGTAATATTGTGAATA  
GAACCACGATAAAAACGAATACAACATCACAGCACAAGGCATGGCATTGTACTCAGCATA  
GCACAACACACAGAACAACACATAAAAGCCATTTCACTACACTTGTAAAGCTtCGAAATCA  
ATCAaTACAATTCATCGCCGATTGTTGTACATCATCATTTTGTCTACTCCATATTACAaGc  
AAGTGACAAAAAGAAAAAAGATCTTTAGTCAAAATGAATGACGAATCaAATAAAGAATG  
GACCCACTACTTCGGTCGAGGAGGCGCTTGCAACCAACAGCGCAAGCAATCTAAGGTGGc  
CGGTTTTGTTGCAGAACTGGCTCTTTGCTATAACCAGTGCCATCGAGAAGAGAAAAGACT  
TTTTGCGAAATGCGAAGTCTATAATATAGTTCTTGAAAAGGGAGGTTTCATTTTTCGAAAT  
AACGAACAAAATAGCCGTGACGTCACGGCGGACGAAATGAAATCAACTACAAAGATCAT  
GCAAGTTTTTCGAGATATAAATAAACGTAACAAGAAGAGTAAAGGGTCTGCAAAGGCGAA  
AAAGAAGCCATCTTTCACTTCTCGAACGAAAAAATAAGCCGTCTTTTTGCACTTTACA  
AACTACAAGAGCAAGAGAATCACGAACGACCAAAATGAAAATAAAAACCTCAACCAAAACG  
CAGGTGCGTCAAGCCTAGCATAATTGAAGCGCCAATCATGAATTGTGTGAGGGATGCTTT  
ACTGATGGCCAGCGCGAAAAGTCAATCGCTTCTGACACAAGGACAAACAAGCTGGGGTT  
GGGTACTCCGGTCAGGGGTAACGGATCCGAGCTGAAGCGACTTATTGCGGAAAGTAATCA  
TCGCTTCTCAACAAATAATGAAACATTTGATTTAATGGCCGTGGAACCACTCAGCTAGA  
GAACTCGTTTTAGTGCCTGATCATGGCGGATGAGGTAACAACGGAACCTCCAACCTGATTC  
TCAAATGAGTGTGAACCTACACCTGCACAAAAGAGTACAGCGACTAGAAAATCTTGTGG  
GATGCTAATGCAGCAGATGTAGAGAGTCTAGTGTAGCAAAATACTTAAACATGGAAACAG  
GAATCACTCGACGCTACGTGTACCAAAAAATATGCAGCGATCGGATTTGCGCAACACAAT  
CTGCTCTCTGGGCTAGCATCAAATCCAATGAAAATGTTCCGCCCGATGGTGACTACTTT  
GACTAAAAAACTTGCTTGAACCTCTGTTACAGCAAAATCAGATGCGCGTGAAAATATTTG  
GTCAGCAAGAGCACGCAAAACTATTTGGTTGCAAGGAATAAAATTTGAGCACGTTT

**Supplementary Figure 5. Sequences of the *MRP3* alleles.** Nucleotide sequences of the A, M, B and N alleles.

|          |                                                                          |     |
|----------|--------------------------------------------------------------------------|-----|
| A_allele | -----AATAATTAGCTATACTACTACT                                              | 22  |
| M_allele | -----                                                                    | 0   |
| B_allele | GTGAATTGTAATACGACTCACTATAGGGCGAATTGGGCCCTCTAGATGCATGCTCGAGCG             | 60  |
| N_allele | -----                                                                    | 0   |
|          |                                                                          |     |
| A_allele | ACTACTACTACTACTACT-----ACTACTACTACTACTACTACTACTACTACTACTACTACT           | 76  |
| M_allele | -----TAGCACATAATTAGCTATACT-----ACTACTACTACT                              | 33  |
| B_allele | GCCGCCAGTGTGATGGATATCTGCAGAATTCGCCCTTGGCAACAAGTGCTTGCTAATGCT             | 120 |
| N_allele | -----                                                                    | 0   |
|          |                                                                          |     |
| A_allele | ACTACTACTACTACTACTACTACTACTACTACTACTACTACTACTACTACTACTACTACTACT          | 136 |
| M_allele | ACTACTACTACTACT-----TACTACTACTACTACTACTACTACTACTACTACTACTACTACT          | 87  |
| B_allele | GCTGCCAAAGCTCAG-ACAACAGCACACTAGCAACAATAATTAGCTATACTACTAGTAGT             | 179 |
| N_allele | -----                                                                    | 0   |
|          |                                                                          |     |
| A_allele | ACTACTACTACTACTACTACTACTACTACTACTACTACTACTACTACTACTACTACTACTAGGAGTACTAGT | 196 |
| M_allele | ACTACTACTACTACTACTACTACTACTACTACTACTACTACTACTACTACTACTACTACTAGTACTAGT    | 147 |
| B_allele | AGTAGTAGTAGTAGTAGTAGTAGTAGTAGGAGGAGGAGGAGGAGGAGGAGGAGGAGGAGGAGGAGTACTAGT | 239 |
| N_allele | -----                                                                    | 0   |
|          |                                                                          |     |
| A_allele | AGTAGTGGGCAGTACTACTAGTAGTAGCTACTAATAGTACTAATAGTACTATTAGTGGTG             | 256 |
| M_allele | AGTAGTGGGCGGTACTACTAGTAGTAGCTACTACTAGTACTAATAGTACTATTAGTGGTG             | 207 |
| B_allele | AGTAGTGGGCggtactactagtagtaGCTACTACTAGTACTAATAGTACTATTAGTGGTG             | 299 |
| N_allele | -----                                                                    | 0   |
|          |                                                                          |     |
| A_allele | GTCTTACTACTACTAGTACTAGTAGCAC---CAGTCGTAGTACTAGCAAAGTACAGCAGT             | 313 |
| M_allele | GTCTTACTACTACTAGTACTACTAGTAGCACCAGTCGTAGTACTAGCAAAGTAC-----              | 261 |
| B_allele | GTCTTACTACTACT---AGTACTAGTAGCACCAGTCGTAGTACTAGCAAAGTAC-----              | 350 |
| N_allele | -----                                                                    | 0   |
|          |                                                                          |     |
| A_allele | ACTACTACTAGTTATTACTAGTAGTAGTACTAGTAGTACTAGACAAGTAATATAGCAGTACTA          | 373 |
| M_allele | AGTACTACTAGTTATTACTAGTAGTAGTACTACTACTAGACAAGTAATATAGCAGTACTA             | 321 |
| B_allele | AGTACTACTAGTTATTACTAGTAGTAGTACTACTACTAGACAAGTAATATAGCAGTACTA             | 410 |
| N_allele | -----                                                                    | 0   |
|          |                                                                          |     |
| A_allele | ATAGTGGTAGTGAAATAAGTTTCTGCTATTCATTGTACAATCCTACATAGGCCCAATATC             | 433 |
| M_allele | ATAGTGGTAGTGAAATAAGTTTCTGCTATTCATTGTACAATCCTACATAGGCCCAATATC             | 381 |
| B_allele | ATGGTGGTAGTGAAATAAGTTTCTGCTATTCATTGTACAATCCTACATAGGCCCAATATC             | 470 |
| N_allele | -----                                                                    | 0   |
|          |                                                                          |     |
| A_allele | AATGACAAACATTTAGGAAAATCAAATAATGAAGATACAATGACACATACTATGGGAAC              | 493 |
| M_allele | AATGACATACATTTAGGAAAATCAAATAATGAAGATACAATGACACATACTATGGGAAC              | 441 |
| B_allele | AATGACATACATTTAGGAAAATCAAATAATGAAGATACAATGACACATACTATGGGAAC              | 530 |
| N_allele | -----ATGACACATACTATGGGAAC<br>*****                                       | 20  |
|          |                                                                          |     |
| A_allele | AGAGGCAAGTACCACCTAAAGACACTTGTATTATTGTACTCATAACCGATTCCAGATTC              | 553 |
| M_allele | AGAGGTAAGTACCACCTAAAGACACTTTTTATTATTGTACTCATAACCGATTCCAGATTC             | 501 |
| B_allele | AGAGGTAAGTACCACCTAAAGACACTTTTTATTATTGTACTCATAACCGATTCCAGATTC             | 590 |
| N_allele | AGAGGtAAGTACCACCTAAAGACACTTtTTATTATTGTACTCATAAcTATTCCAGATTC<br>*****     | 80  |

|          |                                                                              |      |
|----------|------------------------------------------------------------------------------|------|
| A_allele | GTGCCACACGTTCCCTATCTACCACCATAACCGTACGTAGACCCACATCAAGTAAACAATTA               | 613  |
| M_allele | GTGCCACACGTTCCCTATCTACCACCATAACCGTACGTAGACCCACATCAAGTAAACAATTA               | 561  |
| B_allele | GTGCCACACGTTCCCTATCTACCACCATAACCGTACGTAGACCCACATCAAGTAAACAATTA               | 650  |
| N_allele | GTGCCACACGTTCCCTATCTACCACCATAACCGTACGTAGACCCACATCAAGTAAACAATTA<br>*****      | 140  |
| A_allele | ATGGGGTCAAGTAAGAACTTGAAAACCTACCATTACCAACACAACCAGAGAAATGGCGTT                 | 673  |
| M_allele | ATGGGGTCAAGTAAGAACTTGAAAACCTACCATTACCAACACAACCAGAGAAATGGCGTT                 | 621  |
| B_allele | ATGGGGTCAAGTAAGAACTTGAAAACCTACCATTACCAACACAACCAGAGAAATGGCGTT                 | 710  |
| N_allele | ATGGGGTCAAGTAAGAACTTGAAAACCTACCATTACCAACACAACCAGAGAAATGGCGTT<br>*****        | 200  |
| A_allele | TATTCTTGTTTTTGTTTCTGACGGCTTCTGCACAATGGTAGCAACGTAGATTAAAAGAGG                 | 733  |
| M_allele | TATTCTTGTTTTTGTTTCTGACGGCTTCTGCACAATGGTAGCAACGTAGATTAAAAGAGG                 | 681  |
| B_allele | TATCCTTGTTTTTGTTTCTGACGGCTTCTGCACAATGGTAGCAACGTAGATTAAAAGAGG                 | 770  |
| N_allele | TATTCTTGTTTTTGTTTCTGACGGCTTCTGCACAATGGTAGCAACGTAGATTAAAAGAGG<br>*** *****    | 260  |
| A_allele | ACTGAACCAATTGAATCGCTGATTGGACCCGGGAGCCTTTTTTGTTC AAGACACTGGACA                | 793  |
| M_allele | ACTGAACCAATTGAATCGCTGATTGGACCCGGGAGCCTTTTTTGTTC AAGACACTGGACA                | 741  |
| B_allele | ACTGAACCAATTGAATCGCTGATTGGACCCGGGAGCCTTTTTTGTTC AAGACACTGGACA                | 830  |
| N_allele | ACTGAACCAATTGAATCGCTGATTGGACCCGGGAGCCTTTTTTGTTC AAGACACTGGACA<br>*****       | 320  |
| A_allele | AGGCTTAAACGATTTTTGAGTAGGAGTATGTGCCTTTTTTCTTCGATCACAGATCATGTT                 | 853  |
| M_allele | AGGCTTAAACGATTTTTGAGTAGGAGTATGTGCCTTTTTTCTTC AATCACAGATCATGTT                | 801  |
| B_allele | AGGCTTAAACAATTTTTGAGTAGGAGTATGTGCCTTTTTTCTTC GATCACAGATCATGTT                | 890  |
| N_allele | AGGCTTAAACGATTTTTGAGTAGGAGTATGTGCCTTTTTTCTTC aATCACAGATCATGTT<br>***** ***** | 380  |
| A_allele | CAAGGAGGAAAGAATAATACTACGAGTAATATTGTGAATAGAACCACGATAAAAACGAAT                 | 913  |
| M_allele | CAAGGAGGAAAGAATAATACTATGAGTAATATTGTGAATAGAACCACGATAAAAACGAAT                 | 861  |
| B_allele | CAAGGAGGAAAGAATAATACTACGAGTAATATTGTGAATAGAACCACAATAAAAACGAAT                 | 950  |
| N_allele | CAAGGAGGAAAGAATAATACTACGAGTAATATTGTGAATAGAACCACGATAAAAACGAAT<br>***** *****  | 440  |
| A_allele | ACAACATCACAGCACAAGGCATGGCATTGTACTCAGCATAGCACAACACACCGAACACAACA               | 973  |
| M_allele | ACAACATCACAGCACAAGGCATGGCATTGTACTCAGCATAGCACAACACACAGAACGACA                 | 921  |
| B_allele | ACAACATCACAGCACAAGGCATGGCATTGTACTCAGCATAGCACAACACACATAACAACA                 | 1010 |
| N_allele | ACAACATCACAGCACAAGGCATGGCATTGTACTCAGCATAGCACAACACACAGAACAACA<br>***** *** ** | 500  |
| A_allele | CATAAAAGCCATTTCACTACACTtgtaAGCTCCGAAATCAATCAGTACAATTCATCGCCG                 | 1033 |
| M_allele | CATAAAAGCCATTTCACTACACTtgtaAGCTTCGAAATCAATCAATACAATTCATCGCCG                 | 981  |
| B_allele | CATAAAAGCCAtttcactacacttgtaAGCTTCGAAATCAATCAATACAATTCATCGCCG                 | 1070 |
| N_allele | CATAAAAGCCATTTCACTACACTTGTAAGCTTCGAAATCAATCAATACAATTCATCGCCG<br>***** *****  | 560  |
| A_allele | ATTGTTGTACATCATCATTTGTCTACTCCATATTACAACAAGTGACAAAAAGAAAAAAA                  | 1093 |
| M_allele | ATTGTTGTACATCATCATTTGTCTACTCCATATTACAAGCAAGTGACAAAAAGAAAAAAA                 | 1041 |
| B_allele | ATTGTTGTACATCATCATTTGTCTACTCCATATTACAAGCAAGTGACAAAAAGAAAAAAA                 | 1130 |
| N_allele | ATTGTTGTACATCATCATTTGTCTACTCCATATTACAAGCAAGTGACAAAAAGAAAAAAA<br>***** *****  | 620  |
| A_allele | GATCTTTAGTCAAAATGAATGACGAATCGAATAAAGAATGGACCTACTACTTCGGTTCGAG                | 1153 |
| M_allele | GATCTTTAGTCAAAATGAATGACGAATCGAATAAAGAATGGACCTACTACTTCGGTTCGAG                | 1101 |
| B_allele | GATCTTTAGTCAAAATGAATGACGAATCGAATAAAGAATGGACCTACTACTTCGGTTCGAG                | 1190 |
| N_allele | GATCTTTAGTCAAAATGAATGACGAATCAATAAAGAATGGACCTACTACTTCGGTTCGAG<br>***** *****  | 680  |
| A_allele | GAGGCGCTTGCAACCAACAGCGCAAGCAATCTAAGGTGGTCGGTTTGTTCAGAAACTGG                  | 1213 |
| M_allele | GAGGCGCTTGCAACCAACAGCGCAAGCAATCTAAGGTGGTCGGTTTGTTCAGAAACTGG                  | 1161 |
| B_allele | GAGGCGCTTGCAACCAACAGCGCAAGCAATCTAAGGTGGTCGGTTTGTTCAGAAACTGG                  | 1250 |

|          |                                                                                                |      |
|----------|------------------------------------------------------------------------------------------------|------|
| N_allele | GAGGCGCTTGCAACCAACAGCGCAAGCAATCTAAGGTGG <b>C</b> CGGTTTGTTCAGAAACTGG<br>*****                  | 740  |
| A_allele | CTCT <b>C</b> CGCTATAACCAGTGCCATCGAGAAGAGAAAAGACTTTTTGCGAAATGCGAAGTCT                          | 1273 |
| M_allele | CTCT <b>T</b> CGCTATAACCAGTGCCATCGAGAAGAGAAAAGACTTTTTGCGAAATGCGAAGTCT                          | 1221 |
| B_allele | CTCT <b>T</b> CGCTATAACCAGTGCCATCGAGAAGAGAAAAGACTTTTTGCGAAATGCGAAGTCT                          | 1310 |
| N_allele | CTCT <b>T</b> TGCTATAACCAGTGCCATCGAGAAGAGAAAAGACTTTTTGCGAAATGCGAAGTCT<br>****                  | 800  |
| A_allele | ATAATATAGTTCTTGAAAAGGGAGGTT <b>C</b> GTTTTTCGAAATAACGAACAAAATAGCCGTCG                          | 1333 |
| M_allele | ATAATATAGTTCTTGAAAAGGGAGGTT <b>A</b> TTTTTCGAAATAACGAACAAAATAGCCGTCG                           | 1281 |
| B_allele | ATAATATAGTTCTTGAAAAGGGAGGTT <b>C</b> GTTTTTCGAAATAACGAACAAAATAGCCGTCG                          | 1370 |
| N_allele | ATAATATAGTTCTTGAAAAGGGAGGTT <b>A</b> TTTTTCGAAATAACGAACAAAATAGCCGTCG<br>*****                  | 860  |
| A_allele | ACGTCACGGCGGACGAAATGAAATCAACTACAAAGATCATGCAAGTTTTTCGAGATATAA                                   | 1393 |
| M_allele | ACGTCACGGCGGACGAAATGAAATCAACTACAAAGATCATGCAAGTTTTTCGAGATATAA                                   | 1341 |
| B_allele | ACGTCACGGCGGACGAAATGAAATCAACTACAAAGATCATGCAAGTTTTTCGAGATATAA                                   | 1430 |
| N_allele | ACGTCACGGCGGACGAAATGAAATCAACTACAAAGATCATGCAAGTTTTTCGAGATATAA<br>*****                          | 920  |
| A_allele | ATAAA <b>C</b> GTAACAAGAAGAGTAAAGGGTCTGCAAAGGCGAAAAAGAAGCCATCTTTCACCT                          | 1453 |
| M_allele | ATAAA <b>C</b> GTAACAAGAAGAGTAAAGGGTCTGCAAAGGCGAAAAAGAAGCCATCTTTCACCT                          | 1401 |
| B_allele | ATAAA <b>T</b> GTAACAAGAAGAGTAAAGGGTCTGCAAAGGCGAAAAAGAAGCCATCTTTCACCT                          | 1490 |
| N_allele | ATAAA <b>C</b> GTAACAAGAAGAGTAAAGGGTCTGCAAAGGCGAAAAAGAAGCCATCTTTCACCT<br>*****                 | 980  |
| A_allele | CTCGAACGAAAAAATAAG <b>C</b> GTCTTTTTGCACTTTACAACTAC <b>T</b> AGAGCAAGAGAAT                     | 1513 |
| M_allele | CTCGAACGAAAAAATAAG <b>C</b> GTCTTTTTGCACTTTACAACTAC <b>A</b> AGAGCAAGAGAAT                     | 1461 |
| B_allele | CTCGAACGAAAAAATAAG <b>T</b> GTCTTTTTGCACTTTACAACTAC <b>A</b> AGAGCAAGAGAAT                     | 1550 |
| N_allele | CTCGAACGAAAAAATAAG <b>C</b> GTCTTTTTGCACTTTACAACTAC <b>A</b> AGAGCAAGAGAAT<br>*****            | 1040 |
| A_allele | CACGAACGACCAAAATGAAAATAAAAAC <b>T</b> CAACCAAAACGCAGGTGCGTCAAGCCTAGCA                          | 1573 |
| M_allele | CACGAACGACCAAAATGAAAATAAAAAC <b>T</b> CAACCAAAACGCAGGTGCGTCAAGCCTAGCA                          | 1521 |
| B_allele | CACGAACGACCAAAATGAAAATAAAAAC <b>T</b> CAACCAAAACGCAGGTGCGTCAAGCCTAGCA                          | 1610 |
| N_allele | CACGAACGACCAAAATGAAAATAAAAAC <b>T</b> CAACCAAAACGCAGGTGCGTCAAGCCTAGCA<br>*****                 | 1100 |
| A_allele | TAATTGAAGCGCCAATCATGAATTGTGTGAGGGATGCTTTACTGATGGCCAGCGCGAAAA                                   | 1633 |
| M_allele | TAATTGAAGCGCCAATCATGAATTGTGTGAGGGATGCTTTACTGATGGCCAGCGCGAAAA                                   | 1581 |
| B_allele | TAATTGAAGCGCCAATCATGAATTGTGTGAGGGATGCTTTACTGATGGCCAGCGCGAAAA                                   | 1670 |
| N_allele | TAATTGAAGCGCCAATCATGAATTGTGTGAGGGATGCTTTACTGATGGCCAGCGCGAAAA<br>*****                          | 1160 |
| A_allele | GTC AATCGCTTCTTGACACAAGGACAAACAAG <b>C</b> GGGGTTGGGTACTCCGGTCAGGGGTA                          | 1693 |
| M_allele | GTC AATCGCTTCTTGACACAAGGACAAACAAG <b>T</b> GGGGTTGGGTACTCCGGTCAGGGGTA                          | 1641 |
| B_allele | GTC AATCGCTTCTTGACACAAGGACAAACAAG <b>C</b> GGGGTTGGGTACTCCGGTCAGGGGTA                          | 1730 |
| N_allele | GTC AATCGCTTCTTGACACAAGGACAAACAAG <b>T</b> GGGGTTGGGTACTCCGGTCAGGGGTA<br>*****                 | 1220 |
| A_allele | ACGGATCCGAGCTGAAGCGACTTATTGCGGAAAGTAATCATCGCTTCTCAACAAATAATG                                   | 1753 |
| M_allele | ACGGATCCGAGCTGAAGCGACTTATTGCGGAAAGTAATCATCGCTTCTCAACAAATAATG                                   | 1701 |
| B_allele | ACGGATCCGAGCTGAAGCGACTTATTGCGGAAAGTAATCATCGCTTCTCAACAAATAATG                                   | 1790 |
| N_allele | ACGGATCCGAGCTGAAGCGACTTATTGCGGAAAGTAATCATCGCTTCTCAACAAATAATG<br>*****                          | 1280 |
| A_allele | AAACATTTGATTTAATGGCCGTGGAACCAC <b>T</b> CAGCTAGAGA <b>A</b> CTGTTTAGTGC <b>A</b> CTGA          | 1813 |
| M_allele | AAACATTTGATTTAATGGCCGTGGAACCAC <b>T</b> CAGCTAGAGA <b>A</b> CTGTTTAGTGC <b>A</b> CTGA          | 1761 |
| B_allele | AAACATTTGATTTAATGGCCGTGGAACCAC <b>T</b> CAGCTAGAGA <b>A</b> CTGTTTAGTGC <b>A</b> CTGA          | 1850 |
| N_allele | AAACATTTGATTTAATGGCCGTGGAACCAC <b>T</b> CAGCTAGAGA <b>A</b> CTGTTTAGTGC <b>A</b> CTGA<br>***** | 1340 |

|          |                                                                          |      |
|----------|--------------------------------------------------------------------------|------|
| A_allele | TCATGGCGGATGAGGTAACAACGGAACCTCCAACCTGATTCTCAAATGAGTGTGAACCTAC            | 1873 |
| M_allele | TCATGGCGGATGAGGTAACAACGGAACCTCCAACCTGATTCTCAAATGAGTGTGAACCTAC            | 1821 |
| B_allele | TCATGGCGGATGAGGTAACAACGGAACCTCCAACCTGATTCTCAAATGAGTGTGAACCTAC            | 1910 |
| N_allele | TCATGGCGGATGAGGTAACAACGGAACCTCCAACCTGATTCTCAAATGAGTGTGAACCTAC<br>*****   | 1400 |
| A_allele | ACCTGCACAAAAGAGTACAGCGACTAGAAAACTTGTGGGATGCTAATGCAGCAGATGT               | 1933 |
| M_allele | ACCTGCACAAAAGAGTACAGCGACTAGAAAACTTGTGGGATGCTAATGCAGCAGATGT               | 1881 |
| B_allele | ACCTGCACAAAAGAGTACAGCGACTAGAAAACTTGTGGGATGCTAATGCAGCAGATGT               | 1970 |
| N_allele | ACCTGCACAAAAGAGTACAGCGACTAGAAAACTTGTGGGATGCTAATGCAGCAGATGT<br>*****      | 1460 |
| A_allele | agAGAGTCTAGTGTAGCTAAATACTTAAACATGGAAACAGGAATCACTCGACGCTACGTG             | 1993 |
| M_allele | AGAGAGTCTAGTGTAGCAAAATACTTAAACATGGAAACAGGAATCACTCGACGCTACGTG             | 1941 |
| B_allele | AGAGAGTCTAGTGTAGCTAAATACTTAAACATGGAAACAGGAATCACTCGACGCTACGTG             | 2030 |
| N_allele | AGAGAGTCTAGTGTAGCAAAATACTTAAACATGGAAACAGGAATCACTCGACGCTACGTG<br>*****    | 1520 |
| A_allele | TATCAAAAAATATGCAGCGATCGGATTTGCGCAACACAATCTGCTCTCTGGGCTGGCATC             | 2053 |
| M_allele | TACCAAAAAATATGCAGCGATCGGATTTGCGCAACACAATCTGCTCTCTGGGCTAGCATC             | 2001 |
| B_allele | TACCAAAAAATATGCAGCGATCGGATTTGCGCAACACAATCTGCTCTCTGGGCTAGCATC             | 2090 |
| N_allele | TACCAAAAAATATGCAGCGATCGGATTTGCGCAACACAATCTGCTCTCTGGGCTAGCATC<br>** ***** | 1580 |
| A_allele | AAATTCCAAGGAAAATGTTCCGCCCGATGGTGACTACTTTGACTAAAAAACTTGCTTGAA             | 2113 |
| M_allele | AAATTCCAATGAAAATGTTCCGCCCGATGGTGACTACTTTGACTAAAAAACTTGCTTGAA             | 2061 |
| B_allele | AAATTCCAATGAAAATGTTCCGCCCGATGGTGACTACTTTGACTAAAAAACTTGCTTGAA             | 2150 |
| N_allele | AAATTCCAATGAAAATGTTCCGCCCGATGGTGACTACTTTGACTAAAAAACTTGCTTGAA<br>*****    | 1640 |
| A_allele | CTCCTGTTACAGCAAAATCAGATGCGCGTGAAAATATTTGGTCAGCAAGAGCACGCAAAA             | 2173 |
| M_allele | CTCCTGTTACAGCAAAATCAGATGCGCGTGAAAATATTTGGTCAGCAAGAGCACGCAAAA             | 2121 |
| B_allele | CTCCTGTTACAGCAAAATCAGATGCGCGTGAAAATATTTGGTCAGCAAGAGCACGCAAAA             | 2210 |
| N_allele | CTCCTGTTACAGCAAAATCAGATGCGCGTGAAAATATTTGGTCAGCAAGAGCACGCAAAA<br>*****    | 1700 |
| A_allele | CTATTTGGTTGCAAGGAATAAAAATTTGAGCACGTTC                                    | 2209 |
| M_allele | CTATTTGGTTGCAAGGAATAAAAATTTGAGCACGTTC                                    | 2157 |
| B_allele | CTATTTGGTTGCAAGGAATAAAAATTTGAGCACGTTC                                    | 2246 |
| N_allele | CTATTTGGTTGCAAGGAATAAAAATTTGAGCACGTTC<br>*****                           | 1736 |

**Supplementary Figure 6. Sequence alignment of the four *MRP3* alleles.** Alignment of the A, M, B and N *MRP3* alleles. The putative transcription start site is in bold and underlined, in the transcribed portion of the gene nucleotide variants are indicated with colored letters. Asterisks indicate bases identical in all four sequences.

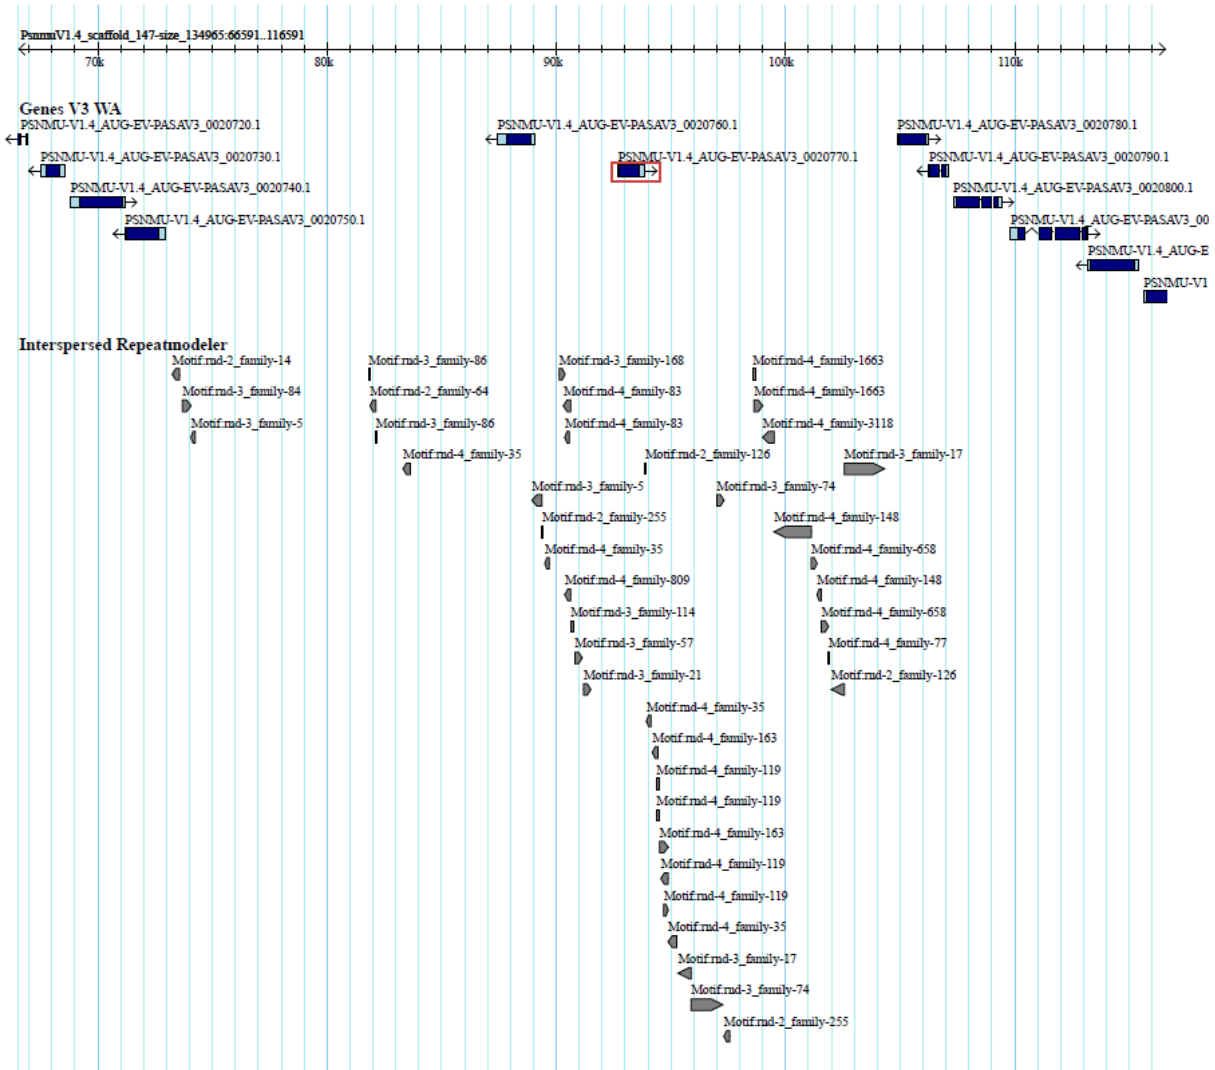

**Supplementary Figure 7. *MRP3* genomic landscape.** A portion of scaffold 147 is depicted. The genomic regions upstream and downstream of *MRP3*, indicated by a red rectangle, are rich in repetitive sequences (gray arrowheads in the lower track) and no coding genes can be found except for one gene located 4 kb upstream of *MRP3*.

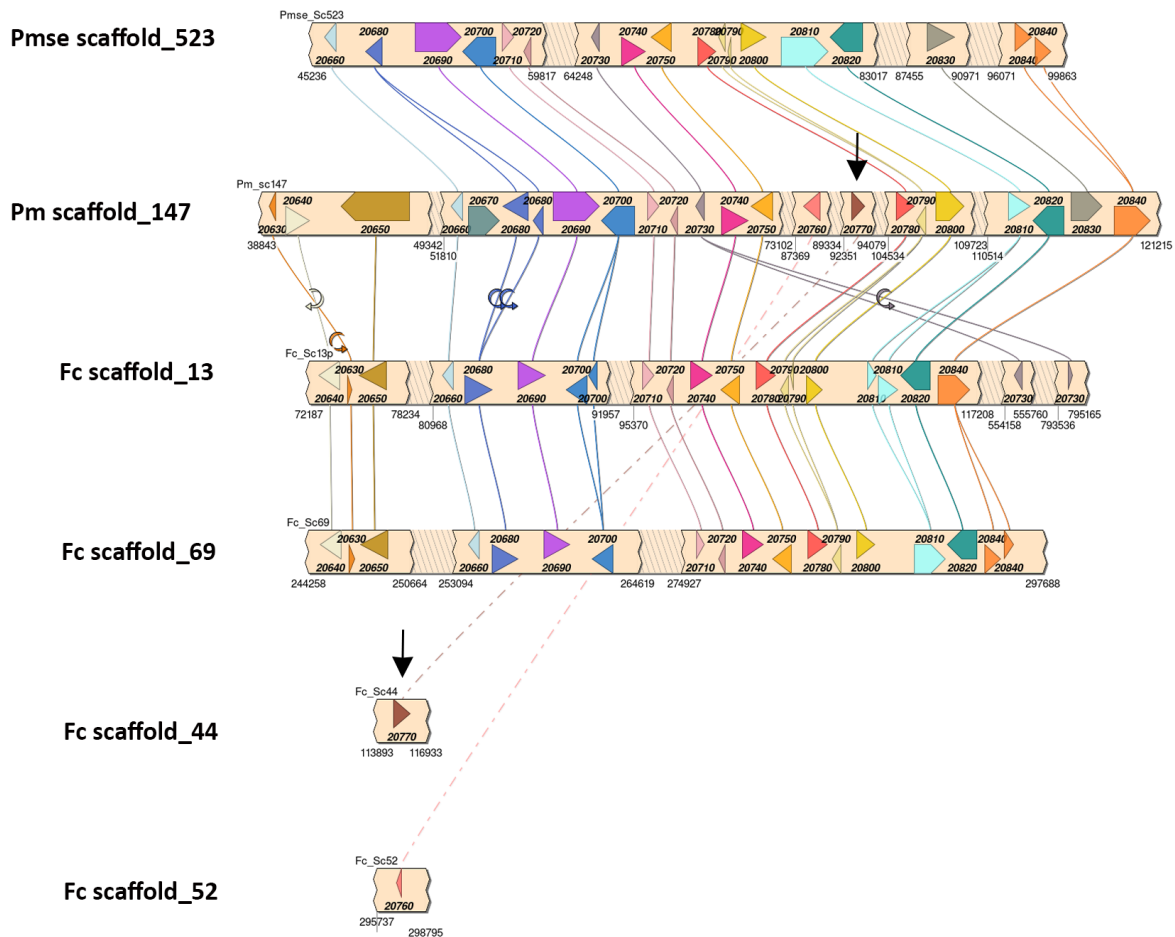

**Supplementary Figure 8. Syntenic analysis of the *MRP3* genomic region.** From the top, schematic representations of *Pseudo-nitzschia multiseriata* (Pmse) scaffold 523, *Pseudo-nitzschia multistriata* (Pm) scaffold 147, *Fragilariopsis cylindrus* (Fc) scaffold 13, scaffold 69, scaffold 44 and scaffold 52. Scaffold segments are numbered with starting and ending nucleotide positions. Arrowheads represent genes. Homologous genes share a single color across species. *P. multistriata* gene names are indicated below the arrowheads, only the last five numbers of gene IDs are reported. The *MRP3* gene (ID 0020770) and its homologue in *F. cylindrus* are indicated by a vertical black arrow. No *MRP3* homologs can be found in the *Pseudo-nitzschia multiseriata* genome. Synteny can be observed among the three species considered for genes upstream and downstream of *MRP3*, while *MRP3* itself and its neighboring gene 0020760 do not appear to retain synteny.



**a**

|           |                                                           |     |
|-----------|-----------------------------------------------------------|-----|
| MRP3_A_Pm | MNDESNKEWTTYFGRGGACNQQRKQSKVVGLLQKLALRYNQCHREEKRLF        | 60  |
| MRP3_M_Pm | MNDESNKEWTTYFGRGGACNQQRKQSKVVGLLQKLALRYNQCHREEKRLF        | 60  |
| MRP3_B_Pm | MNDESNKEWTTYFGRGGACNQQRKQSKVVGLLQKLALRYNQCHREEKRLF        | 60  |
| MRP3_N_Pm | MNDESNKEWTHYFGRGGACNQQRKQSKVAGLLQKLALCYNQCHREEKRLF        | 60  |
|           | *****:*****.***** *****                                   |     |
| MRP3_A_Pm | EKGGSFFEITNKIAVDVTADEMKSSTTKIMQVFRDINKRNKSKSGSAKAKKPSFTSR | 120 |
| MRP3_M_Pm | EKGGSFFEITNKIAVDVTADEMKSSTTKIMQVFRDINKRNKSKSGSAKAKKPSFTSR | 120 |
| MRP3_B_Pm | EKGGSFFEITNKIAVDVTADEMKSSTTKIMQVFRDINKCNKSKSGSAKAKKPSFTSR | 120 |
| MRP3_N_Pm | EKGGSFFEITNKIAVDVTADEMKSSTTKIMQVFRDINKRNKSKSGSAKAKKPSFTSR | 120 |
|           | ***** *****                                               |     |
| MRP3_A_Pm | NKPSFCTLQTTTRESRTTKMKIKTQPKRRCVKPSIEAPIMNCVRDALLMASAKS    | 180 |
| MRP3_M_Pm | NKPSFCTLQTTTRESRTTKMKIKTQPKRRCVKPSIEAPIMNCVRDALLMASAKS    | 180 |
| MRP3_B_Pm | NKLSFCTLQTTTRESRTTKMKIKTQPKRRCVKPSIEAPIMNCVRDALLMASAKS    | 180 |
| MRP3_N_Pm | NKPSFCTLQTTTRESRTTKMKIKTQPKRRCVKPSIEAPIMNCVRDALLMASAKS    | 180 |
|           | ** *****                                                  |     |
| MRP3_A_Pm | DTRTNKPLGLTPVRGNGSELKRLIAESNHRFSTNNETFDLMAVEPPQLENSFSAL   | 240 |
| MRP3_M_Pm | DTRTNKPLGLTPVRGNGSELKRLIAESNHRFSTNNETFDLMAVEPPQLENSFSAL   | 240 |
| MRP3_B_Pm | DTRTNKPLGLTPVRGNGSELKRLIAESNHRFSTNNETFDLMAVEPPQLENSFSAL   | 240 |
| MRP3_N_Pm | DTRTNKPLGLTPVRGNGSELKRLIAESNHRFSTNNETFDLMAVEPPQLENSFSAL   | 240 |
|           | ***** *****                                               |     |
| MRP3_A_Pm | VTTELPTDSQMSVNLHLHHRVQRLENLVGMLMQQM                       | 275 |
| MRP3_M_Pm | VTTELPTDSQMSVNLHLHHRVQRLENLVGMLMQQM                       | 275 |
| MRP3_B_Pm | VTTELPTDSQMSVNLHLHHRVQRLENLVGMLMQQM                       | 275 |
| MRP3_N_Pm | VTTELPTDSQMSVNLHLHHRVQRLENLVGMLMQQM                       | 275 |
|           | *****                                                     |     |

**b**

```
CAMNT_0003586753_Pseudo-nitzschia_delicatissima          -----MSETSKSEWDFYFGRGGGSKKRQVSKANILVHDLAFRYSY--CSQTEKRLFAK 52
TRINITY_DN7331_c0_g1_i1_Pseudo-nitzschia_arenysensis    -----MSDCSNSEWDFYFGRGGGSKKRQVSKANSVLQDLAVRYSY--CRQTEKRLFAK 52
MRP3_Pseudo-nitzschia_multistriata                       -----MNDESNEKWTYFGRGGACNQQRKQSKVVGLLQKLAALRYNQ--CHREEKRLFAK 52
CAMNT_0008188179_Pseudo-nitzschia_australis              -----HPHQTDEEWNFYFGRGRSRNHQRKSKVSGLLQNLAPRYRT--CDPGHRLFAK 52
CAMNT_0047551615_Pseudo-nitzschia_fraudulenta           -----MTDTAREQWVYFGRGGIGNKRRKSKVSELLQKLAAPRYST--CHPTERRLFAK 0
CAMNT_0013109375_Pseudo-nitzschia_pungens_cingulata     -----MTDTAREQWVYFGRGGIGNKRRKSKVSELLQKLAAPRYST--CHPTERRLFAK 52
CAMNT_0013140303_Pseudo-nitzschia_pungens_pungens       -----MTDTAREQWVYFGRGGIGNKRRKSKVSELLQKLAAPRYST--CHPTERRLFAK 0
jgi_Fracyl1|272356_Fragilariopsis_cylindrus              -----MTDTAREQWVYFGRGGIGNKRRKSKVSELLQKLAAPRYST--CHPTERRLFAK 0
CAMNT_0041255159_Fragilariopsis_kerguelensis_L2-C3      M-----MMMNNSLNNNDENWYFGRGAENNKARKTSRANLLIQELAPLYIDPRTSPDKQTF 60
CAMNT_0011363179_Fragilariopsis_kerguelensis_L26-C5     -----MMMNNSLNNNDENWYFGRGAENNKARKTSRANLLIQELAPLYIDPRTSPDKQTF 0

CAMNT_0003586753_Pseudo-nitzschia_delicatissima          NEVYDITVVNNGGTFELVANKEIIDVTKDFDDTISRIMQSFDRDINKSRRRAISQTLSTNVEA 112
TRINITY_DN7331_c0_g1_i1_Pseudo-nitzschia_arenysensis    NEVYDITVVNNGGTFELVANKEIIDVTKDFDDTINRIMQSFDRDINKICKTTSQPVSTRAEA 112
MRP3_Pseudo-nitzschia_multistriata                       CEVYNIVLEKGGGFFEITNKIADVDTADEMKSTTKIMQVFRDINKRKNKSKSGAKAKK-- 111
CAMNT_0008188179_Pseudo-nitzschia_australis              HEVYNVAVLKKGGSF FKLQNNMFPVDVTADEFESTTKIMQAFRDIKKQCKLASQSHKSSH 112
CAMNT_0047551615_Pseudo-nitzschia_fraudulenta           -----MTKIMQA FRDINKQCRTPPRPSPS-LHP 27
CAMNT_0013109375_Pseudo-nitzschia_pungens_cingulata     NEVYNTVLNNGGAF FQIKDKLPLVNVVTANEHSTTKIMQAFRDIKNKGNKVPVTHSHVGT 112
CAMNT_0013140303_Pseudo-nitzschia_pungens_pungens       -----MQA FRDINKGNKVPVTHSHVGT 24
jgi_Fracyl1|272356_Fragilariopsis_cylindrus              -----MQA FRDINKGNKVPVTHSHVGT 0
CAMNT_0041255159_Fragilariopsis_kerguelensis_L2-C3      QKVYDVVVNNNGGRFIEKDKNI----TADKVA CLKKIMQGLRDCNKVVNKQ-----CK 108
CAMNT_0011363179_Fragilariopsis_kerguelensis_L26-C5     -----MQGLRDCNKVVNKQ-----CK 16

CAMNT_0003586753_Pseudo-nitzschia_delicatissima          KKVT-----N-----NKSMQST 124
TRINITY_DN7331_c0_g1_i1_Pseudo-nitzschia_arenysensis    KKVPSQKRSSPILMPT-----ARDAN-----RKNMQST 140
MRP3_Pseudo-nitzschia_multistriata                       PSFT-----SRTKKN-----KP-----SFCTLQIT 131
CAMNT_0008188179_Pseudo-nitzschia_australis              LITSSRK--NK-----IKRM--KTSSSQ-----KNTKRPSETP 143
CAMNT_0047551615_Pseudo-nitzschia_fraudulenta           PPSPRK--RPLSTPGAGKNSPPKKKAMTSRQSRNDSSME-RPSTMVHDVPSRLNRNHP 84
CAMNT_0013109375_Pseudo-nitzschia_pungens_cingulata     PSP--PR-----KTK--TKA-----P-----KRVQ 129
CAMNT_0013140303_Pseudo-nitzschia_pungens_pungens       PPSPPR-----KTN--TKA-----P-----KRVQ 43
jgi_Fracyl1|272356_Fragilariopsis_cylindrus              -----KTN--TKA-----P-----KRVQ 0
CAMNT_0041255159_Fragilariopsis_kerguelensis_L2-C3      PLPPSP-----KSL---LKKTRDESRVKKTPSN-----CLEIINVP 142
CAMNT_0011363179_Fragilariopsis_kerguelensis_L26-C5     PLPPSP-----KSL---LKKTRDESRVKKTPSN-----CLEIINVP 50

CAMNT_0003586753_Pseudo-nitzschia_delicatissima          SLNTRKRVPLSKKSSRPKRCIRPSVIEPPEIDCVDRDLRVIDTEKITPYTTQL---HIG 181
TRINITY_DN7331_c0_g1_i1_Pseudo-nitzschia_arenysensis    SVKTKRVS LIKKS PRPKRCIRPSIIEPPEIDCVDRDLRVVDDADKIKQNGKTI---SVG 197
MRP3_Pseudo-nitzschia_multistriata                       RARESRT HKMKIKTPKRCVVKPSIEAPIMNCRDALLMASAKS QSLPDRIT---NK 186
CAMNT_0008188179_Pseudo-nitzschia_australis              STKNPSPTMP--SSPPKRCVVKPSIEPPEIDCVDRDRMVDVNE S IPEISAVS SEMKVS 201
CAMNT_0047551615_Pseudo-nitzschia_fraudulenta           SIKRPSTIMHDVTSRPRKRCVVKPSIEPPEIDCVKEALRVVMKDKTKPRGNSTKAKKVV 144
CAMNT_0013109375_Pseudo-nitzschia_pungens_cingulata     STKGP SPTMR--LSPAKRRCVVKPSIEPPEIDCVRKA LRMFNADSE S I P DVG SDRERHCE 187
CAMNT_0013140303_Pseudo-nitzschia_pungens_pungens       STKRP SPTMR--LSPAKRRCVVKPSIEPPEIDCVREALRMLFNADSE S I P DVG SDRERHCE 101
jgi_Fracyl1|272356_Fragilariopsis_cylindrus              -----MTSALK----VD 8
CAMNT_0041255159_Fragilariopsis_kerguelensis_L2-C3      SLKRT SSIIP--VRCQKRA CVKLP IVEA P I I ECVRDA LNVAKISGENQADTVN----ID 195
CAMNT_0011363179_Fragilariopsis_kerguelensis_L26-C5     SLKRT SSIIP--VRCQKRA CVKLP IVEA P I I ECVRDA LNVAKISGENQADTVN----ID 103

CAMNT_0003586753_Pseudo-nitzschia_delicatissima          ELNILLDDG--ESRNTSINENGLCQLAADDELEKMWVEK LKLDNF FSQVVMTDE IKARHP 239
TRINITY_DN7331_c0_g1_i1_Pseudo-nitzschia_arenysensis    EIHITSCDD--GTSKSKFDERGLCQLAADDAFEKMWVEPKLDNSFSQLIMTDE IKA--- 252
MRP3_Pseudo-nitzschia_multistriata                       XGLGT PVRGNGSELKRLIAESNHRFSTNNETFDLMAVEPQLENSFSALIMADEVIT--- 243
CAMNT_0008188179_Pseudo-nitzschia_australis              SNHKI PVS GGG SAQKPLVKDDTIRNLSTDDMFDTMAVEEPKLESSFSALIMADEITA--- 258
CAMNT_0047551615_Pseudo-nitzschia_fraudulenta           RNV-LGGDGERIERKSDGKYGHHA LTYDDP LARMAVEP KLDNSFSALIMTDEITA--- 200
CAMNT_0013109375_Pseudo-nitzschia_pungens_cingulata     NSNQASDVTCGQTPL---NKDS TRH FLSNDT FETMIVEP P KLENSFSALIMADEITA--- 241
CAMNT_0013140303_Pseudo-nitzschia_pungens_pungens       NSNQASDVTCGQTPL---NKDS TRH FSSNDA FETMIVEP P KLENSFSALIMADEITA--- 155
jgi_Fracyl1|272356_Fragilariopsis_cylindrus              GENLSGG-----GG---ARQELYG SEDNVLERMAEPPKLENSFSALIMADEITA--- 57
CAMNT_0041255159_Fragilariopsis_kerguelensis_L2-C3      EKKAPSGI-----RV---AREEKCDNENKDI LEI MALEPPQLENSFSALIMTDEITA--- 244
CAMNT_0011363179_Fragilariopsis_kerguelensis_L26-C5     EKKAPSGI-----RV---AREEKCDNENKDI LEI MALEPPQLENSFSALIMTDEITA--- 152
. : : * * :*: * * :*: * * :

CAMNT_0003586753_Pseudo-nitzschia_delicatissima          QQSLNHLRVQRLENLVMAMLQIKSRLPTDAQRSANLNH SRVQRLENLVSVMVQRKNDE 299
TRINITY_DN7331_c0_g1_i1_Pseudo-nitzschia_arenysensis    -----HLPTDSQQSVNLNHL SRVQRLENLVMAMLQQKND 287
MRP3_Pseudo-nitzschia_multistriata                       -----ELPTDSQMSVNLHLKRVQRLENLVMAMLQQM--- 275
CAMNT_0008188179_Pseudo-nitzschia_australis              -----DLPTDSQKSINQLH SRVQRLENLVMAMLQQQNV 293
CAMNT_0047551615_Pseudo-nitzschia_fraudulenta           -----VLPDSQKSEINLH SRVQRLENLVMAMLQQKND 235
CAMNT_0013109375_Pseudo-nitzschia_pungens_cingulata     -----DLPTDSQKSVNQLH SRVQRLENLVSMLMQQQND 276
CAMNT_0013140303_Pseudo-nitzschia_pungens_pungens       -----DLPTDSQKSVNQLH SRVQRLENLVSMLMQQQND 190
jgi_Fracyl1|272356_Fragilariopsis_cylindrus              -----DLPTDSQKNINQLH SRVQRLENLVMAMLQQKND 92
CAMNT_0041255159_Fragilariopsis_kerguelensis_L2-C3      -----DLPTGSL E EYKQSVHARVQRLENLVMAMLQQKNE 279
CAMNT_0011363179_Fragilariopsis_kerguelensis_L26-C5     -----DH-----VLLARVQRLENLVMAMLQQKNE 177
: * : * : * : * : * :

CAMNT_0003586753_Pseudo-nitzschia_delicatissima          KELKSAARIISNF 312
TRINITY_DN7331_c0_g1_i1_Pseudo-nitzschia_arenysensis    MELLK----- 293
MRP3_Pseudo-nitzschia_multistriata                       ----- 275
CAMNT_0008188179_Pseudo-nitzschia_australis              LERLL----- 298
CAMNT_0047551615_Pseudo-nitzschia_fraudulenta           MELLK----- 241
CAMNT_0013109375_Pseudo-nitzschia_pungens_cingulata     LERLL----- 281
CAMNT_0013140303_Pseudo-nitzschia_pungens_pungens       LERLL----- 195
jgi_Fracyl1|272356_Fragilariopsis_cylindrus              LERLL----- 97
CAMNT_0041255159_Fragilariopsis_kerguelensis_L2-C3      FERLL----- 284
```

**Supplementary Figure 9. MRP3 protein sequence alignments.** **A.** Alignment of the predicted proteins translated from the four *MRP3* alleles. **B.** Alignment of the predicted proteins translated from the *MRP3* homologues identified in public databases. \* indicates positions which have a fully conserved residue, : indicates conservation between groups of strongly similar properties, . indicates conservation between groups of weakly similar properties.

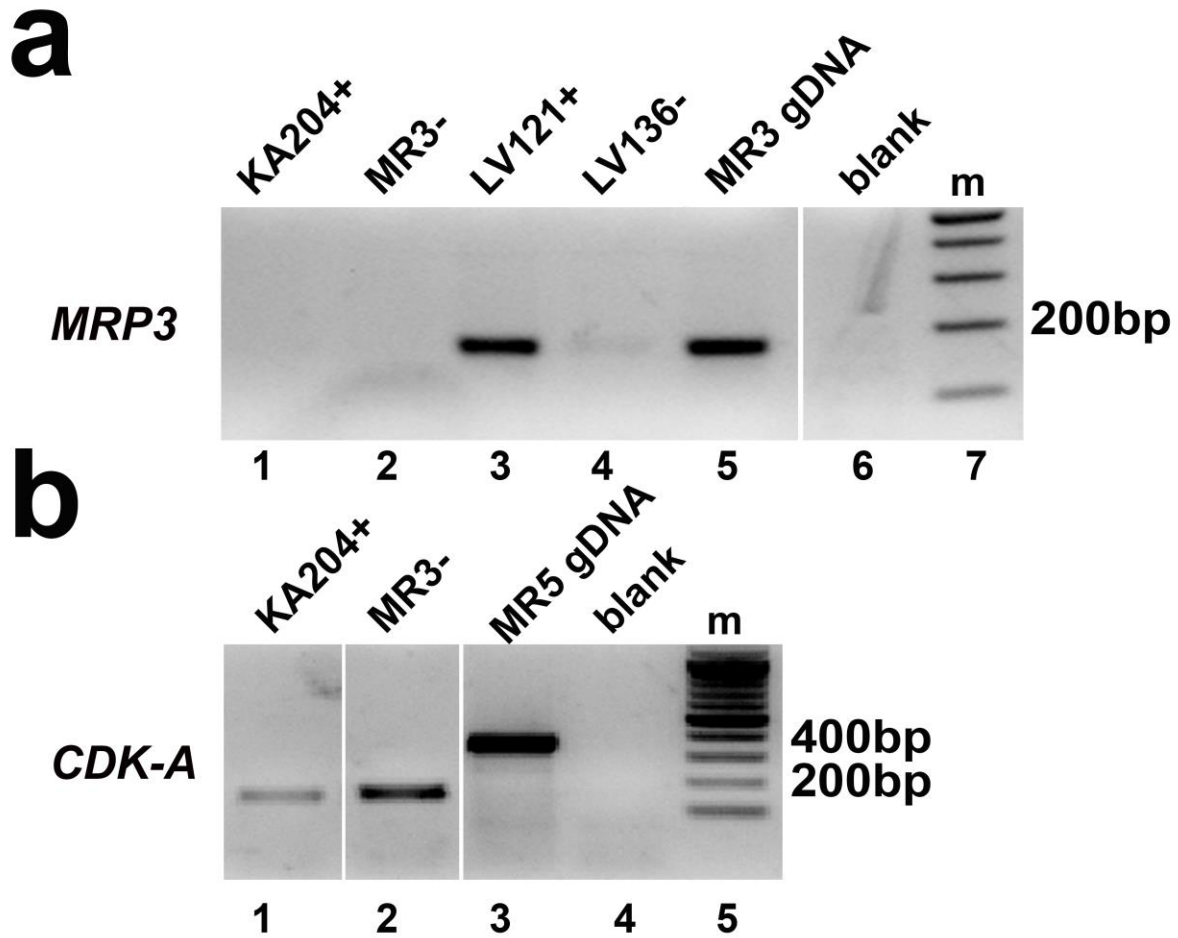

**Supplementary Figure 10. *MRP3* expression in strains >SST. A.** PCR amplification of an *MRP3* fragment from the cDNA of two strains >SST (lanes 1-2) and of two strains <SST (lanes 3-4). gDNA is used as a control for the reaction (lane 5). **B.** PCR amplification of an intron-containing fragment of the control gene *CDK-A* from the cDNA of the same strains >SST shown in a. + indicates MT+, - indicates MT-.

**a**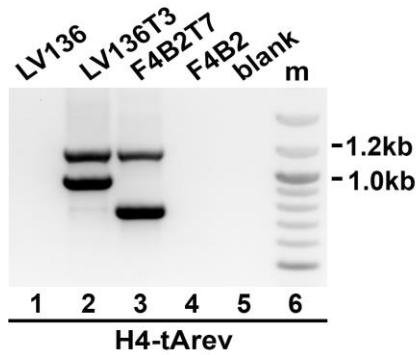**b**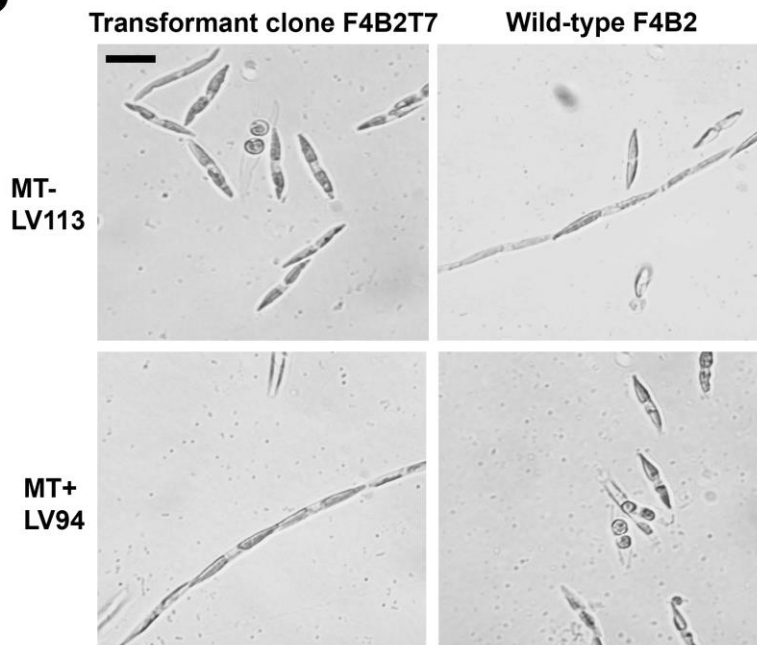

**Supplementary Figure 11. Sex reversal in the transgenic strain F4B2T7. A.** PCR showing integration of full length NAT resistance gene and of the *MRP3* transgene in the genomic DNA of the LV136T3 transformant (lane 2), and of the *Sh-ble* resistance gene and *MRP3* transgene in the genomic DNA of the F4B2T7 transformant (lane 3). Note that the plasmids used for transformation all have the same H4 promoter and the same FcpA terminator, amplification with a primer in the promoter and a primer in the terminator yields a 1.2 kb band for the *MRP3* transgene, a 1 kb band for the NAT transgene and a 0.8 kb band for the *Sh-ble* transgene. **B.** Images of crosses of transformant strain F4B2T7 and of wild-type MT- strain F4B2 with the MT- strain LV113 and the MT+ strain LV94. F4B2T7 cells mated with the MT- strain producing gametes, whereas they did not mate with the MT+ strain. The opposite occurred for the wild type strain F4B2. Scale bar= 20  $\mu$ m.

**a**

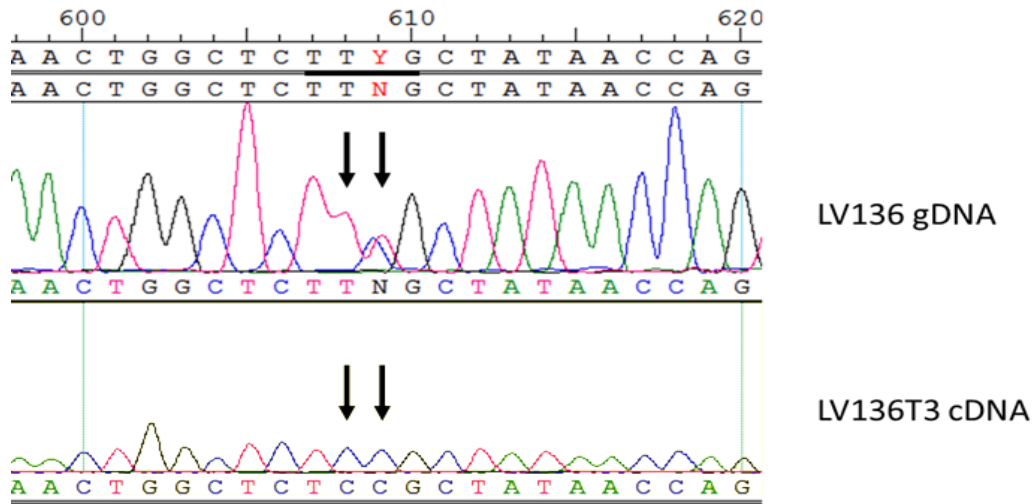

**b**

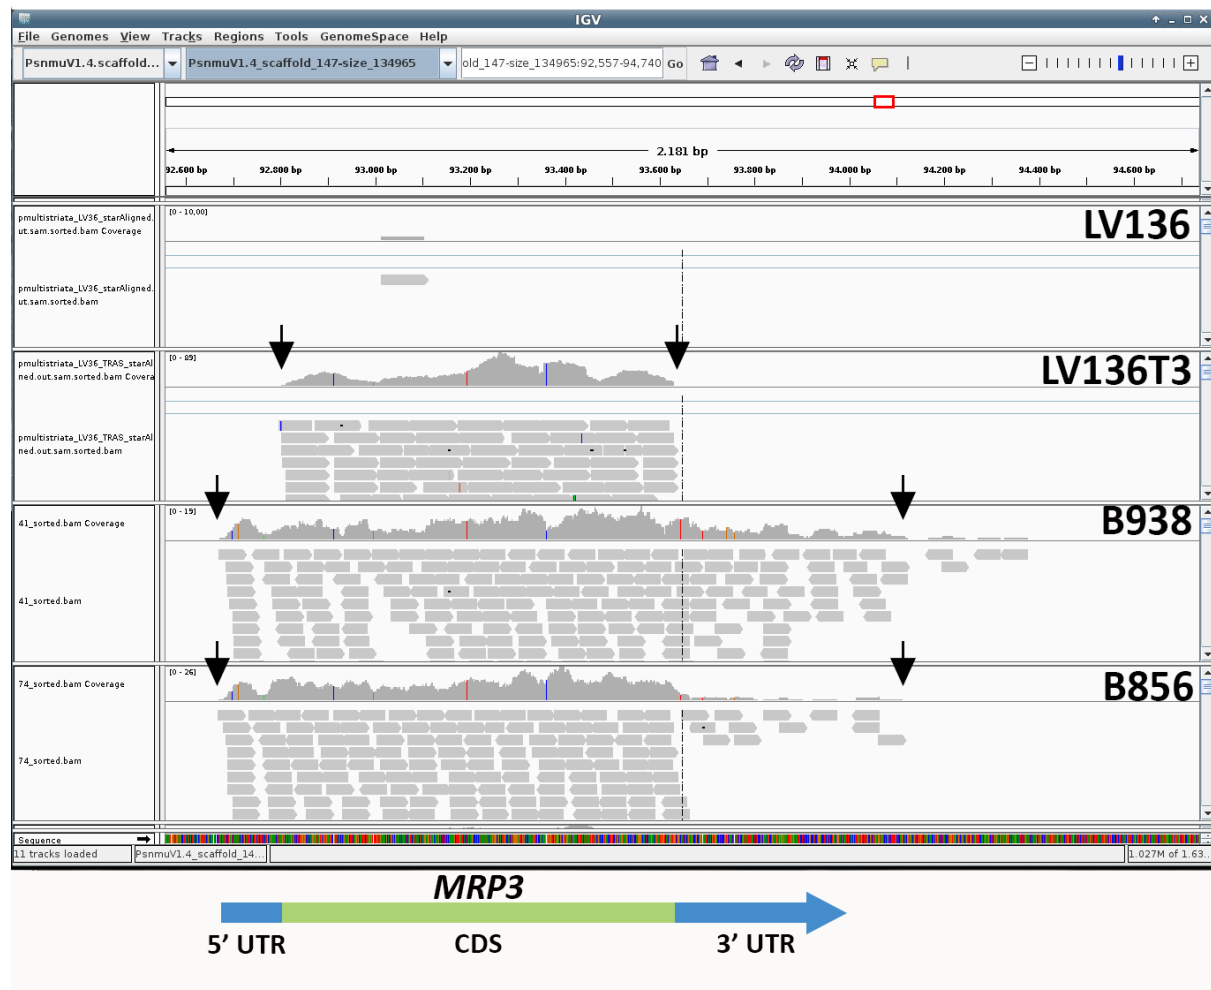

**Supplementary Figure 12. Exogenous expression of *MRP3* in the transgenic strain**

**LV136T3. A.** The *MRP3* transcript expressed in the LV136T3 strain (bottom track) has the sequence of the transgene inserted and not of the endogenous gene (top track). The transgene was obtained by cloning the LV149 strain transcript (see Results). Note that LV149 and LV136 have different alleles with two consecutive SNPs (indicated by the two arrows). LV149 has the A/M genotype TYCG (see Figure 3B), while LV136 has the B/N genotype TTYG.

Also note that the sequenced fragment of LV136 gDNA has been amplified with forward primer F147p2 which is outside of the *MRP3* CDS. Therefore, it only amplifies the endogenous locus and not the transgene which is inserted randomly in the genome.

**B.** IGV visualization of the RNA-seq reads obtained from strains LV136, LV136T3, B938 and B856 mapped to the scaffold 147 region where the *MRP3* gene lies. Note that no reads are present for the MT- strain LV136 as the gene is not expressed, and that the reads present in the transgenic strain LV136T3 correspond to the CDS of the gene only, in contrast to the wild type MT+ strains B938 and B856 in which reads can be found also for the 5' and 3' UTRs. Vertical black arrows indicate the start and end of the transcript in each strain. Gray peaks indicate the number of reads (indicative of the levels of expression), colored vertical bars indicate nucleotides that differ with respect to the reference genome sequence, gray arrowheads are single reads mapped to the genome. A schematic representation of the transcript with its 5' UTR, CDS and 3' UTR in their approximate position in the genome is shown below.

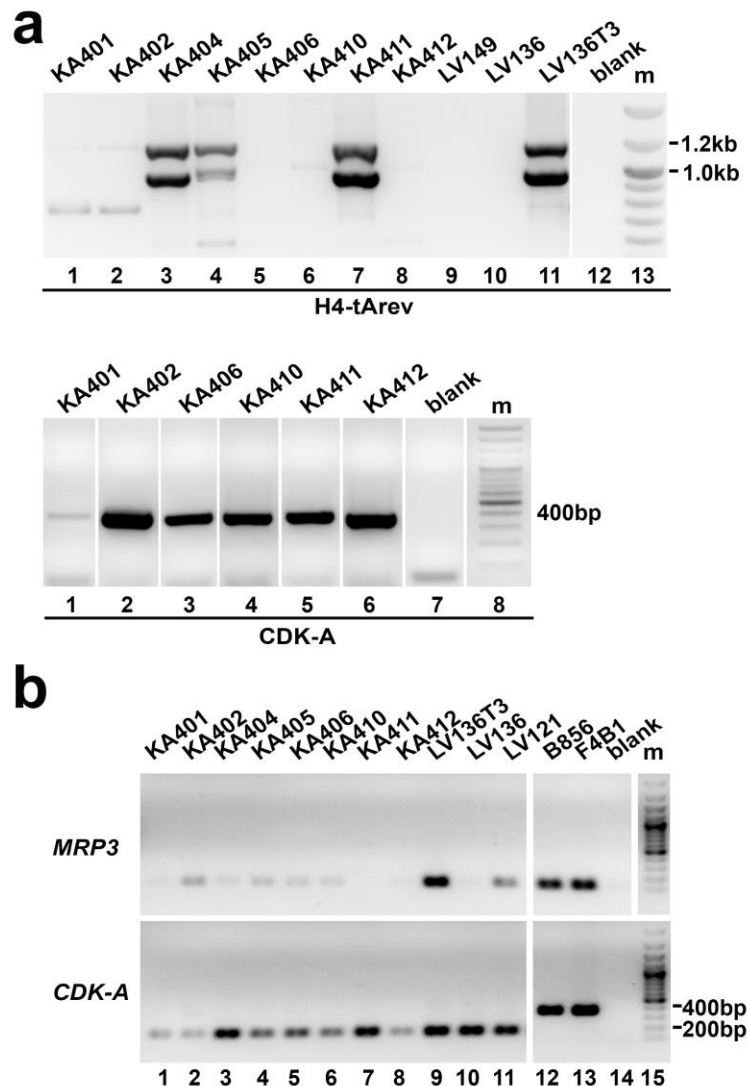

**Supplementary Figure 13. *MRP3* in the LV136T3 F1 progeny. A.** PCR screen to detect the presence of transgenes in the genomic DNA of the LV136T3 transformant F1 progeny. Amplification with a primer in the H4 promoter and a primer in the FcpA terminator yield a 1.2 kb band for the *MRP3* transgene and a 1 kb band for the NAT transgene. Note that the two plasmids used for transformation have the same promoter and the same terminator. In the top gel, lanes 1-8 contain F1 strains, lane 9-10 contain two wild type strains, lane 11 contains the LV136T3 transformant. As a quality control for the DNA, in the bottom gel the amplification of a control gene, *CDK-A*, is shown for the F1 strains that were negative for the presence of transgenes in the top gel. **B.** *MRP3* expression in the F1 progeny. Top gel, PCR amplification on the cDNAs obtained from the F1 progeny (lanes 1-8), from the LV136T3 transformant (lane 9), from the non-transformed LV136, and from an MT+ strain used as control. Lanes 12-13 contain gDNAs used as controls for the reaction. In the bottom gel, amplification of an intron-containing fragment of the control *CDK-A* gene is shown for the same samples.



>TRINITY\_DN16811\_c0\_g1\_i1

ATTCATCGATCACAAATATTCACGACAAAATCACTTTCAAATCAGAATTCATACAGATTC  
ACAATAACGAAAATTGAAACATTCAAAGGCCATTGAAAGCAAATCGAGAGCCAAAAAC  
ATATTGCAAACGATTTTCGTTTATTCATCATGTCCAGATACAATCCAAAAGCCACCATCC  
GTGAAGACGAAGAGTATCTCGATGCCGAGGTGGCTCCAAGAACTCCGGAAAATTCTGTAG  
TGACGGCCGGAGTCTCTTATCTTCGCTTCTACGACCATTGGCCGCGAACAACATCCTG  
ACCAAACCAATCAAGTCTCGAATCCCAGTTTGCCAGCAAAGACTTTGATGACGACTTTA  
ACAAGAAGAGAAACTTTAGTTTTGACTGGTTCATTTGGACCATGTTGGGAATGACCATTG  
TGCTCTTGACCTTGGTTGGATATGGATTGCGTTCGGGCCTTTATCTTCCCAACAAGACAA  
CTGTTGGCGGTGATGCTATTGCCAATCCAACGATGCCGCAAGTCTTGCTGCGAGTGATG  
GAAGCCTTTCCGAAGGAGAAAACGCCCGCTCTTTCTCTAACCAACCCAGAAAACCAATCGTC  
AAGATTTACAAGTACAGCATCATGACCCCTTTGGCTTTGCCATTGTCTGATGGAAGGTGACT  
CTGCCCAAGCTCAGGCGATTGATTGGCTGGCCTTTGACGACGAACCCCTCTTTGACCCAA  
ATGCGATGGAAACCCAGGAAGACCAACACAAAGAGCGATTGACACAGCGCTATGCCTTGG  
TGGTGTGGTATTTTTGACCAGGGTGGCCCAGCCATGTGGACAACCTTGAATCGGGAAGAAT  
CTGCCGGATGGATTGTGAACGGTGCCGGGGTTCACGAGTGCAACTGGAGGGGAATCGATT  
GCGACTACAGCGAAATCAGTGATGGGAAAGTCAATGGACTTCGGCTATCGCCTATTGGCG  
GGCTCTTGTGACGGGTTCCTCCGTGTCTTCCGAGCTAGGGTTGCTGACAGGCCTCCAAC  
GCATCGATTTTGGCGATCAGCGCATTGAGGGGAAGATTCCAAATTCATGGGCCCTCCTGA  
CCAATCTTGAAACGGTGGTTCTTTCTGACAACAAGTTGCAATCGACGATTCCCGATTGGA  
TAGGGGGATGGACGAACCTTCGGCATCTAGCGCTGGATGGAATCAGTTGTACGGAACAA  
TTCCCTCGTCTTTGCCACTCTCCAAAATTTGAAAGACTAGAGCTACAACAGAATCCCC  
AGCTCCGGGGTCCATTTGAAGTATTGTTTTCCCAACAATATGACTTCCGGCCCTCTAA  
AGACCCTCGAGCATTTAGATCTTTCCAACACTGATCTGGAGGGTGAGCTCCCCAGTACCA  
CTCTCCCATCCCTCAAGTTTCTGCGAATGTGGAATCTCAATGGATTGGTAGGGACAATCC  
CAACACAAATCGGGAGCTGGTCCAACCTGGAATACTTGAGCCTAATGGAAAACAAAAACA  
TCATGGGGAGCATCCCCACCGAGTTGGGCCTACTGACAAATCTCGAAGCCATCGAGATCC  
TCGACAGCTTCCTCATGTCTGGAATCTACCAACCGAGCTGGGCAATCTCAACCTCAAGA  
GACTCAACGTTCGTTACATAAACAACAACTGGAATCCTTCCCGTTGAGTGGTCCAATATTA  
GTAGCTACATGTTTTGGATTGTCAGCAACAACCATCTGGAAGGGACGATCCCCCACAAT  
ACTCTCAACTCAGCCAGCTCGAGTTCTTTTTCTTCCAGTACAACAAGTTGACTGGAGAAG  
TTCCCGGGGAGTTTGTTCCTCGAAAATCGTCAGGAATTTCTCGTTGATTGTGATAAGG  
GAGTTGGAAGAGGCAATATTACTTGTCTCTGCTGTTTCGTGCATTTGATCAGCAATGCTTC  
TACAAGAGTAAATGCGGGTTCAAATAAATGATGGAAGAATTAATGATACTAATAGCAC  
TAAATTTTCAATTTCTCCATCGTTTTAAAATAAAGATAGCAGATTTCTTGAATCAAAT  
CGTGGAATATCAGTT

>TRINITY\_DN7331\_c0\_g1\_i1

CACTGCGAACACAACGTCTCATGAGCACGAAAACGAAATGCAATTTGAAAAGTAATGTT  
CTAGCTACAATCGAAACGGCATTATTTTTCTTCGCTACGTGTGATTAGACTCAATTTAAAG  
TATGTCAGACTGTTGCAATAGTGAATGGGATTTCTATTTCCGACGGGGTGGTGGCTCGAA  
CCAGAAGCGACAAGTTTCAAAGCCAATAGTTTGGTGCAAGATTTGGCTGTTTCGTTATAG  
TTACTGTAGACAAACTGAGAAAAGGCTCTTTGCAAAGAACGAAGTTTACGATACTGTTGT  
TAACAATGGCGGCACCTTTCTTTCTTGTACCAATAAAGAATTCATTGACGTCACGAAGGA  
CTTTGACGATACTATAAATAGGATCATGCAAAGCTTTTCGAGACATCAATAAAATTTGCAA  
AACAACATCCCAACCAGTATCAACAAGGGCTGAAGCGAAAAAAGTGCCGTCGCAGAAAAG  
ATCATCTCCGATTTCTAATGCCAACAGCTCGAGACGCGAACGAAAAAACATGCAATCCAC  
GAGTGTCAAACAAAAGAGTGTCTAATTAATCAAGAAATCACCTCGTCCAAAGCGTAGATG  
TATACGGCCCAGTATAATCGAACCGCCTGTTATTGAATGCGTGAGGGATGCCCTCAGAGT  
TGTCGACGCCGACAAAATAAAGCAAAATGGGAAAACACAGATCAGTGTGCGGGGAGATACA  
TACTACTTCATGCGATGATGGAACATCCAAGAGCAAGTTTCGATGAAAGGGGTCTTTGTCA  
ACTGGCAGCAGATGATGCATTTGAGAAAATGGTTCGTGGAACCACCAAAGCTAGATAATTC  
TTTCAGTCAATTTGATCATGACGGATGAAATCAAAGCGCATCTTCCAACGACTCACAACA  
GTCGGTCAATCTCAATCTTCATTCAAGAGTACAACGTCTAGAGAACCTGGTAGCGATGCT  
AATGCAACAAAAGAACGATGAAATGGAACACTACTGTTAAAATAGGTTCTTTTTCTTTGCTA  
ATCTGAGGAAGATTGTGTGTTGTGGCTGTGTTGATACTGGTGTGGTGTACAAGTAGCA  
GTTTTGTTGCCATTCTTCAGTTTACGCTATGTCTATCGTTTTAAATCGCGCCGCTTTTTTC  
AAGACCCGGGCATGCATCATTGAGTGCACATATCATTCTGAGGTATTTGAAACAGAGAC

ATGAGGATTTGGGTTAGTAAATGTCGTCTAACGGGCAGACAAATTTGGAGCGATGCTTAA  
GGATTCTAATCACAATAGAGTACAATCGCATTAGCAAAGATTTATATCATCGCAAAAAA  
AAAAA

**Supplementary Figure 14. *MRP2* and *MRP3* nucleotide sequences in *Pseudo-nitzschia arenysensis*.**

**Supplementary Note 1: Uncropped gel images**

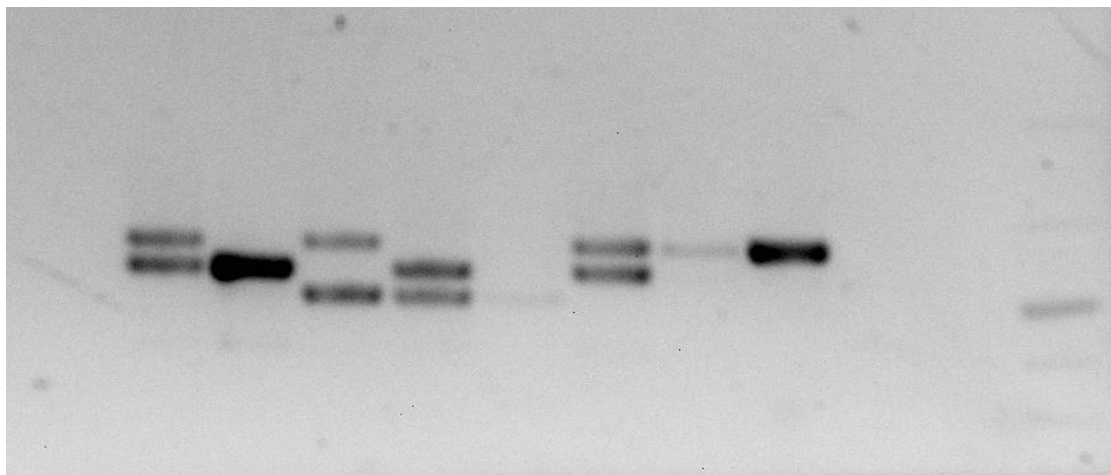

Uncropped gel Fig. 2b

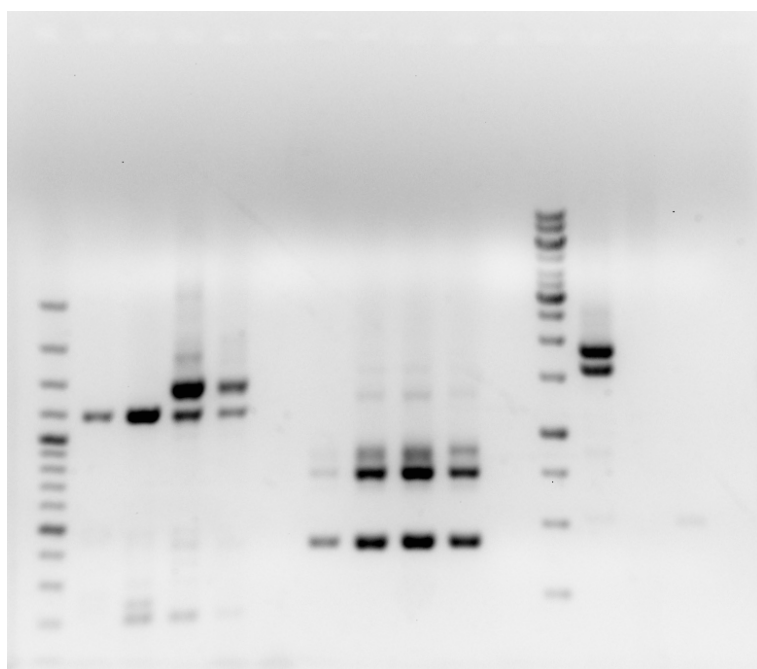

Uncropped gel Fig. 2c-d

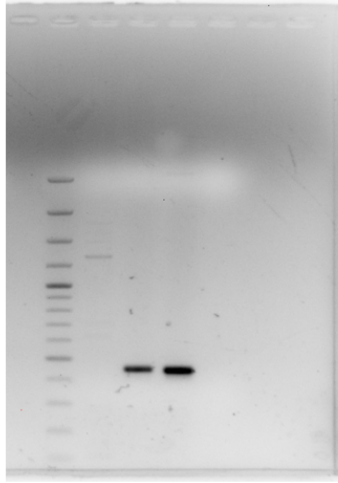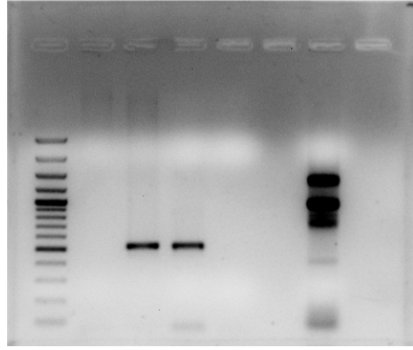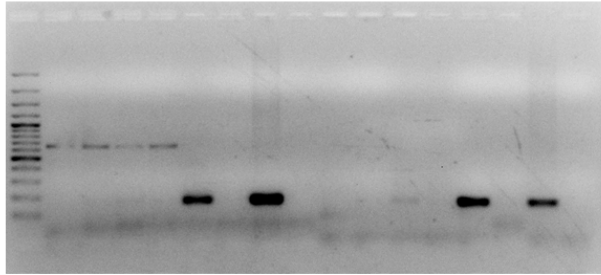

Uncropped gels Fig. 4a

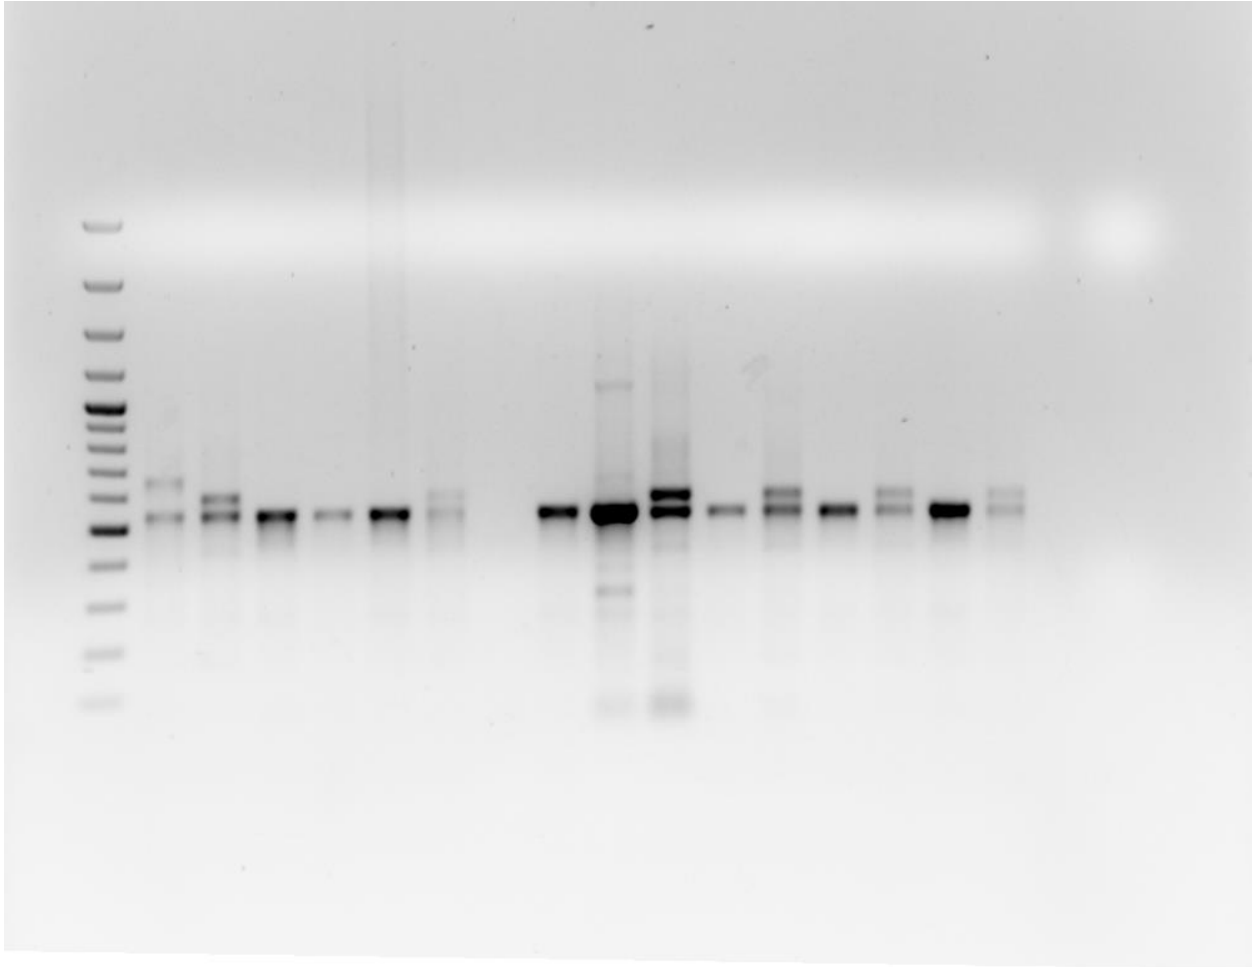

Uncropped gel Fig. 4c

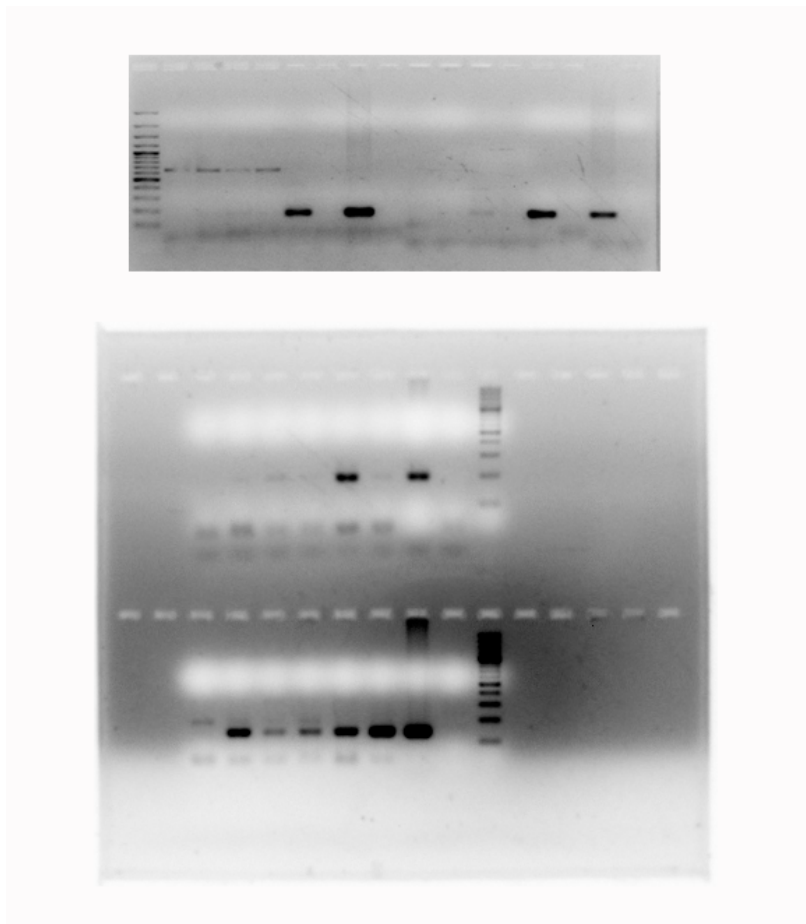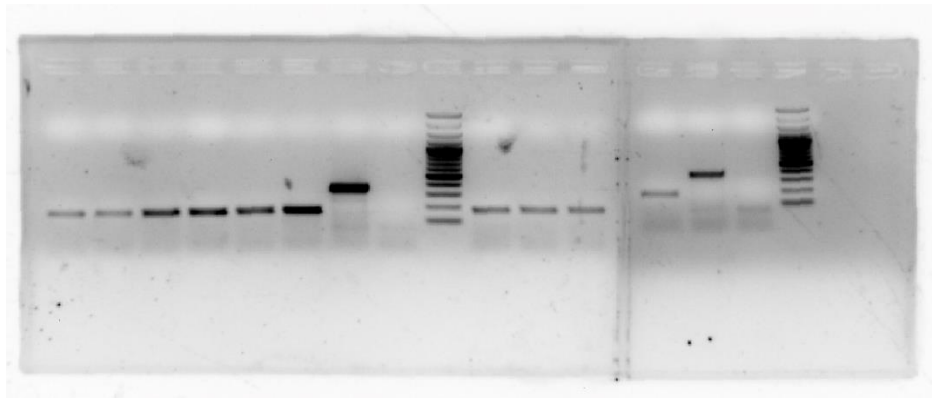

Uncropped gels Fig. 4d

## Supplementary References

1. Basu, S. *et al.* Finding a partner in the ocean: molecular and evolutionary bases of the response to sexual cues in a planktonic diatom. *New Phytol.* **215**, 140–156 (2017).
2. Mock, T. *et al.* Evolutionary genomics of the cold-adapted diatom *Fragilariopsis cylindrus*. *Nature* **541**, 536–540 (2017).
